# Supplementary material for: Drug Repurposing for Japanese Encephalitis Virus Infection by Systems Biology Methods
Source: MDPI journal article supplement (doi:10.3390/molecules23123346), 2018-12-18
Supplement: s1 [file s1]

**Supplementary Table 3: The significant sub-networks associated with encephalitis**

| Subnetwork index | Components |          |          |          |        |        |       |
|------------------|------------|----------|----------|----------|--------|--------|-------|
| 1                | ATM        | BIRC7    | NOL7     | NRBP1    | PHF1   | PKNOX1 | STK11 |
| 2                | ACACA      | ARHGAP1  | LARS     | PC       | PSMD10 |        |       |
| 3                | ADAR       | FOXG1    | IFI16    | PSMA7    | WDR46  |        |       |
| 4                | LMO4       | SEC23IP  | SLAMF1   | TPM3     | VPS52  |        |       |
| 5                | PSMB8      | PSMB9    | TAP1     | TAP2     | TAPBP  |        |       |
| 6                | BRD2       | BRD7     | RPLP1    | RPS18    |        |        |       |
| 7                | DLEU1      | QKI      | SETDB1   | TXNDC9   |        |        |       |
| 8                | HAX1       | NDUFS2   | NTM      | SDHC     |        |        |       |
| 9                | HLA-DMA    | HLA-DMB  | HLA-DOA  | HLA-DRB1 |        |        |       |
| 10               | ANKS1A     | ARHGAP10 | PAK2     |          |        |        |       |
| 11               | ASAH2      | KIFC1    | PARD6B   |          |        |        |       |
| 12               | B4GALT3    | HLA-DPA1 | HLA-DPB1 |          |        |        |       |
| 13               | CUTA       | PPP4R2   | SMEK2    |          |        |        |       |
| 14               | EEF1A2     | FRAS1    | NXPH2    |          |        |        |       |
| 15               | FOXP4      | NRAS     | RGL2     |          |        |        |       |
| 16               | HLA-DQA1   | HLA-DQA2 | HLA-DQB1 |          |        |        |       |
