# Supplementary material for: Drug Repurposing for Japanese Encephalitis Virus Infection by Systems Biology Methods
Source: MDPI journal article supplement (doi:10.3390/molecules23123346), 2018-12-18
Supplement: s1 [file s1]

Supplementary Table 1: The functional genes participating in JEV infection ranked by GeneRank algorithm

| Symbol                                                                                                                                                                                             | Description                                                                                                                                                                                                                                                                                                        | GenBank                                                                                                                                                                      | KEGG pathway                                                                                                                                                                                                                                                                                                                                                                                                                                                                                                                                                                                                                                                                                                                                                                                                                                                           |
|----------------------------------------------------------------------------------------------------------------------------------------------------------------------------------------------------|--------------------------------------------------------------------------------------------------------------------------------------------------------------------------------------------------------------------------------------------------------------------------------------------------------------------|------------------------------------------------------------------------------------------------------------------------------------------------------------------------------|------------------------------------------------------------------------------------------------------------------------------------------------------------------------------------------------------------------------------------------------------------------------------------------------------------------------------------------------------------------------------------------------------------------------------------------------------------------------------------------------------------------------------------------------------------------------------------------------------------------------------------------------------------------------------------------------------------------------------------------------------------------------------------------------------------------------------------------------------------------------|
| ABCC9<br>ABLI                                                                                                                                                                                      | ATP binding cassette subfamily C member 9                                                                                                                                                                                                                                                                          | NM_005691.3                                                                                                                                                                  | hsa02010                                                                                                                                                                                                                                                                                                                                                                                                                                                                                                                                                                                                                                                                                                                                                                                                                                                               |
| ACACB                                                                                                                                                                                              | acetyl-CoA carboxylase beta                                                                                                                                                                                                                                                                                        | NM_001093.3                                                                                                                                                                  | hsa00620, hsa00620, hsa00061, hsa04152, hsa04910, hsa04922, hsa04920, hsa04931                                                                                                                                                                                                                                                                                                                                                                                                                                                                                                                                                                                                                                                                                                                                                                                         |
| ACLY<br>ACTA1<br>ACTA2                                                                                                                                                                             | ATP citrate lyase<br>actin, alpha 1, skeletal muscle                                                                                                                                                                                                                                                               | NM_001096.2<br>NM_001100.3                                                                                                                                                   | hsa00020                                                                                                                                                                                                                                                                                                                                                                                                                                                                                                                                                                                                                                                                                                                                                                                                                                                               |
| ACTB                                                                                                                                                                                               | actin beta                                                                                                                                                                                                                                                                                                         | NM_001101.4                                                                                                                                                                  | hsa04015, hsa04390, hsa04145, hsa04210, hsa04510, hsa04520, hsa04530, hsa04810, hsa04611, hsa04670, hsa04921, hsa04919, hsa04971, hsa04714, hsa05205, hsa05225, hsa05418, hsa05410, hsa05412, hsa05414, hsa05416, hsa05110, hsa05130, hsa05132, hsa05131, hsa05100, hsa05164                                                                                                                                                                                                                                                                                                                                                                                                                                                                                                                                                                                           |
| ACTBL2<br>ACTC1<br>ACTG1<br>ACTL7A<br>ACTL7B<br>ACTL9<br>ACTN2<br>ACTRT2<br>ACVR1C<br>ADAMTS17<br>ADAR<br>ADCY4<br>AGTR1<br>AKAP9                                                                  | actinin alpha 2                                                                                                                                                                                                                                                                                                    | NM_001103.3                                                                                                                                                                  | hsa05412                                                                                                                                                                                                                                                                                                                                                                                                                                                                                                                                                                                                                                                                                                                                                                                                                                                               |
| AKT1                                                                                                                                                                                               | AKT serine/threonine kinase 1                                                                                                                                                                                                                                                                                      | NM_005163.2                                                                                                                                                                  | hsa04014, hsa04015, hsa04010, hsa04012, hsa04370, hsa04371, hsa04630, hsa04668, hsa04066, hsa04068, hsa04072, hsa04071, hsa04024, hsa04022, hsa04151, hsa04152, hsa04150, hsa04140, hsa04210, hsa04218, hsa04510, hsa04550, hsa04611, hsa04620, hsa04625, hsa04660, hsa04662, hsa04664, hsa04666, hsa04062, hsa04910, hsa04922, hsa04923, hsa04920, hsa04915, hsa04914, hsa04917, hsa04926, hsa04919, hsa04261, hsa04973, hsa04725, hsa04728, hsa04722, hsa04380, hsa04211, hsa04213, hsa05200, hsa05230, hsa05231, hsa05205, hsa05210, hsa05212, hsa05225, hsa05226, hsa05214, hsa05221, hsa05220, hsa05218, hsa05211, hsa05215, hsa05213, hsa05224, hsa05222, hsa05223, hsa05418, hsa04932, hsa04931, hsa04933, hsa05152, hsa05166, hsa05162, hsa05164, hsa05161, hsa05160, hsa05163, hsa05167, hsa05169, hsa05165, hsa05145, hsa05142, hsa01521, hsa01524, hsa01522 |
| ALB<br>ALDH1A1<br>ANGPT1<br>ANKRD20A5<br>ANKRD34B<br>ANKRD36<br>ANXA10<br>AP1S2<br>APOL2<br>APP<br>ARL4A<br>ARL5B<br>ARRB1<br>ARRB2<br>ASB11<br>ASH1L<br>ATAD2B<br>ATF3<br>AVPR2<br>BAMBI<br>BATF2 | albumin<br><br><br><br><br><br><br><br>amyloid beta precursor protein<br>ADP ribosylation factor like GTPase 4A<br><br><br>arrestin beta 1<br>arrestin beta 2<br><br><br>activating transcription factor 3<br><br>BMP and activin membrane bound inhibitor<br>basic leucine zipper ATF-like transcription factor 2 | NM_000477.6<br><br><br><br><br><br><br><br>NM_000484.3<br>NM_005738.4<br><br><br>NM_004041.4<br>NM_004313.3<br><br><br><br><br>NM_001674.3<br><br>NM_012342.2<br>NM_138456.3 | hsa04918<br><br><br><br><br><br><br><br>hsa04726, hsa05010<br><br><br><br><br><br><br><br>hsa04010, hsa04340, hsa04144, hsa04062, hsa04926, hsa04928, hsa04740, hsa05032<br>hsa04010, hsa04340, hsa04144, hsa04062, hsa04926, hsa04928, hsa04740, hsa05032<br><br><br><br><br><br><br><br>hsa05166<br><br>hsa04310, hsa04350                                                                                                                                                                                                                                                                                                                                                                                                                                                                                                                                           |
| BCL2                                                                                                                                                                                               | BCL2, apoptosis regulator                                                                                                                                                                                                                                                                                          | NM_000633.2                                                                                                                                                                  | hsa04141, hsa04340, hsa04630, hsa04064, hsa04066, hsa04071, hsa04151, hsa04140, hsa04210, hsa04215, hsa04217, hsa04115, hsa04510, hsa04621, hsa04915, hsa04928, hsa04261, hsa04725, hsa04722, hsa05200, hsa05206, hsa05210, hsa05226, hsa05215, hsa05222, hsa05014, hsa05418, hsa04933, hsa05152, hsa05161, hsa05169, hsa05145, hsa01521, hsa01524, hsa01522                                                                                                                                                                                                                                                                                                                                                                                                                                                                                                           |
| BCL2A1<br>BCL6<br>BIRC6<br>BMP2<br>BST2                                                                                                                                                            | BCL2 related protein A1<br><br><br><br>bone marrow stromal cell antigen 2                                                                                                                                                                                                                                          | NM_004049.3<br><br><br><br>NM_004335.3                                                                                                                                       | hsa04064, hsa04210, hsa05202, hsa05221                                                                                                                                                                                                                                                                                                                                                                                                                                                                                                                                                                                                                                                                                                                                                                                                                                 |
| Torf76/LRRC7                                                                                                                                                                                       | Leucine-rich repeat-containing protein 75A                                                                                                                                                                                                                                                                         | NM_001113567.2                                                                                                                                                               |                                                                                                                                                                                                                                                                                                                                                                                                                                                                                                                                                                                                                                                                                                                                                                                                                                                                        |
| C1R<br>C1S<br>C3AR1<br>CA2                                                                                                                                                                         | complement C1r<br>complement C1s<br>complement C3a receptor 1                                                                                                                                                                                                                                                      | NM_001733.6<br>NM_201442.3<br>NM_004054.3                                                                                                                                    | hsa04145, hsa04610, hsa05322, hsa05133, hsa05150<br>hsa04610, hsa05322, hsa05133, hsa05150<br>hsa04080, hsa04610, hsa05150                                                                                                                                                                                                                                                                                                                                                                                                                                                                                                                                                                                                                                                                                                                                             |
| CACNA1F<br>CAD                                                                                                                                                                                     | carbamoyl-phosphate synthetase 2, aspartate transcarb                                                                                                                                                                                                                                                              | NM_004341.4                                                                                                                                                                  | hsa00240, hsa00250<br>hsa04014, hsa04015, hsa04371, hsa04020, hsa04070, hsa04024, hsa04022, hsa04114, hsa04218, hsa04625, hsa04910, hsa04922, hsa04912, hsa04915, hsa04921, hsa04916, hsa04924, hsa04925, hsa04261, hsa04270, hsa04970, hsa04971, hsa04728, hsa04720, hsa04722, hsa04744, hsa04740, hsa04750, hsa04713, hsa05200, hsa05214, hsa05010, hsa05031, hsa05034, hsa05418, hsa05133, hsa05152, hsa05163, hsa05167                                                                                                                                                                                                                                                                                                                                                                                                                                             |
| CALM1                                                                                                                                                                                              | calmodulin 1                                                                                                                                                                                                                                                                                                       | NM_001363670.1                                                                                                                                                               |                                                                                                                                                                                                                                                                                                                                                                                                                                                                                                                                                                                                                                                                                                                                                                                                                                                                        |

|         |                                         |                |                                                                                                                                                                                                                                                                                                                                                                                                      |
|---------|-----------------------------------------|----------------|------------------------------------------------------------------------------------------------------------------------------------------------------------------------------------------------------------------------------------------------------------------------------------------------------------------------------------------------------------------------------------------------------|
| CALM2   | calmodulin 2                            | NM_001305624.1 | hsa04014, hsa04015, hsa04371, hsa04020, hsa04070, hsa04024, hsa04022, hsa04114, hsa04218, hsa04625, hsa04910, hsa04922, hsa04912, hsa04915, hsa04921, hsa04916, hsa04924, hsa04925, hsa04261, hsa04270, hsa04970, hsa04971, hsa04728, hsa04720, hsa04722, hsa04744, hsa04740, hsa04750, hsa04713, hsa05200, hsa05214, hsa05010, hsa05031, hsa05034, hsa05418, hsa05133, hsa05152, hsa05163, hsa05167 |
| CALM3   | calmodulin 3                            | NM_005184.3    | hsa04014, hsa04015, hsa04371, hsa04020, hsa04070, hsa04024, hsa04022, hsa04114, hsa04218, hsa04625, hsa04910, hsa04922, hsa04912, hsa04915, hsa04921, hsa04916, hsa04924, hsa04925, hsa04261, hsa04270, hsa04970, hsa04971, hsa04728, hsa04720, hsa04722, hsa04744, hsa04740, hsa04750, hsa04713, hsa05200, hsa05214, hsa05010, hsa05031, hsa05034, hsa05418, hsa05133, hsa05152, hsa05163, hsa05167 |
| CASP1   | caspase 1                               | NM_001257118.2 | hsa04217, hsa04621, hsa04623, hsa04625, hsa05014, hsa05132, hsa05133, hsa05134, hsa05164                                                                                                                                                                                                                                                                                                             |
| CASP3   | caspase 3                               | NM_004346.3    | hsa04010, hsa04668, hsa04210, hsa04215, hsa04115, hsa04650, hsa04657, hsa04726, hsa05200, hsa05206, hsa05205, hsa05203, hsa05210, hsa05222, hsa05010, hsa05012, hsa05014, hsa05016, hsa05416, hsa04932, hsa04933, hsa05120, hsa05133, hsa05134, hsa05152, hsa05161, hsa05168, hsa05163, hsa05167, hsa05165, hsa05146, hsa05145, hsa01524                                                             |
| CASP5   |                                         |                |                                                                                                                                                                                                                                                                                                                                                                                                      |
| CAT     |                                         |                |                                                                                                                                                                                                                                                                                                                                                                                                      |
| CBL     |                                         |                |                                                                                                                                                                                                                                                                                                                                                                                                      |
| CCDC85A |                                         |                |                                                                                                                                                                                                                                                                                                                                                                                                      |
| CCL20   | C-C motif chemokine ligand 20           | NM_004591.2    | hsa04668, hsa04060, hsa04657, hsa04062, hsa05323                                                                                                                                                                                                                                                                                                                                                     |
| CCL26   | C-C motif chemokine ligand 26           | NM_006072.4    | hsa04060, hsa04062                                                                                                                                                                                                                                                                                                                                                                                   |
| CCL5    | C-C motif chemokine ligand 5            | NM_002985.2    | hsa04668, hsa04060, hsa04620, hsa04621, hsa04623, hsa04062, hsa05323, hsa05020, hsa05120, hsa05164, hsa05168, hsa05163, hsa05142                                                                                                                                                                                                                                                                     |
| CCND1   |                                         |                |                                                                                                                                                                                                                                                                                                                                                                                                      |
| CCNT1   |                                         |                |                                                                                                                                                                                                                                                                                                                                                                                                      |
| CD274   | CD274 molecule                          | NM_014143.3    | hsa04514                                                                                                                                                                                                                                                                                                                                                                                             |
| CD40LG  |                                         |                |                                                                                                                                                                                                                                                                                                                                                                                                      |
| CD44    |                                         |                |                                                                                                                                                                                                                                                                                                                                                                                                      |
| CD68    |                                         |                |                                                                                                                                                                                                                                                                                                                                                                                                      |
| CDC20   |                                         |                |                                                                                                                                                                                                                                                                                                                                                                                                      |
| CDC25C  |                                         |                |                                                                                                                                                                                                                                                                                                                                                                                                      |
| CDC40   |                                         |                |                                                                                                                                                                                                                                                                                                                                                                                                      |
| CDC42   | cell division cycle 42                  | NM_001791.3    | hsa04014, hsa04015, hsa04010, hsa04370, hsa04144, hsa04510, hsa04520, hsa04530, hsa04810, hsa04660, hsa04666, hsa04670, hsa04062, hsa04912, hsa04722, hsa04360, hsa05200, hsa05205, hsa05203, hsa05212, hsa05211, hsa04932, hsa04933, hsa05120, hsa05130, hsa05132, hsa05131, hsa05100, hsa05165                                                                                                     |
| CDH1    | cadherin 1                              | NM_004360.4    | hsa04015, hsa04390, hsa04371, hsa04514, hsa04520, hsa05200, hsa05226, hsa05216, hsa05218, hsa05219, hsa05213, hsa05130, hsa05100                                                                                                                                                                                                                                                                     |
| CDK1    |                                         |                |                                                                                                                                                                                                                                                                                                                                                                                                      |
| CDK2    |                                         |                |                                                                                                                                                                                                                                                                                                                                                                                                      |
| CFB     | complement factor B                     | NM_001710.5    | hsa04610, hsa05150                                                                                                                                                                                                                                                                                                                                                                                   |
| CFTR    |                                         |                |                                                                                                                                                                                                                                                                                                                                                                                                      |
| CGA     |                                         |                |                                                                                                                                                                                                                                                                                                                                                                                                      |
| CH25H   | cholesterol 25-hydroxylase              | NM_003956.3    | hsa00120                                                                                                                                                                                                                                                                                                                                                                                             |
| CHRNA1  |                                         |                |                                                                                                                                                                                                                                                                                                                                                                                                      |
| CMPK2   | cytidine/uridine monophosphate kinase 2 | NM_207315.3    | hsa00240                                                                                                                                                                                                                                                                                                                                                                                             |
| CNDP1   |                                         |                |                                                                                                                                                                                                                                                                                                                                                                                                      |
| CNTF    |                                         |                |                                                                                                                                                                                                                                                                                                                                                                                                      |
| COL17A1 |                                         |                |                                                                                                                                                                                                                                                                                                                                                                                                      |
| COL1A1  |                                         |                |                                                                                                                                                                                                                                                                                                                                                                                                      |
| CREB1   |                                         |                |                                                                                                                                                                                                                                                                                                                                                                                                      |
| CREBBP  |                                         |                |                                                                                                                                                                                                                                                                                                                                                                                                      |
| CSF2    |                                         |                |                                                                                                                                                                                                                                                                                                                                                                                                      |
| CSTA    |                                         |                |                                                                                                                                                                                                                                                                                                                                                                                                      |
| CTAGE3P |                                         |                |                                                                                                                                                                                                                                                                                                                                                                                                      |
| CTNNB1  | catenin beta 1                          | NM_001904.3    | hsa04015, hsa04310, hsa04390, hsa04510, hsa04520, hsa04550, hsa04670, hsa04919, hsa04916, hsa05200, hsa05205, hsa05210, hsa05225, hsa05226, hsa05216, hsa05217, hsa05215, hsa05213, hsa05224, hsa05418, hsa05412, hsa04934, hsa05130, hsa05100, hsa05166, hsa05163, hsa05167, hsa05165                                                                                                               |
| CTSS    | cathepsin S                             | NM_004079.4    | hsa04145, hsa04142, hsa04210, hsa04612, hsa05152                                                                                                                                                                                                                                                                                                                                                     |
| CXCL10  | C-X-C motif chemokine ligand 10         | NM_001565.3    | hsa04668, hsa04060, hsa04620, hsa04622, hsa04623, hsa04657, hsa04062, hsa05164                                                                                                                                                                                                                                                                                                                       |
| CXCL11  | C-X-C motif chemokine ligand 11         | NM_005409.4    | hsa04060, hsa04620, hsa04062                                                                                                                                                                                                                                                                                                                                                                         |
| CXCL3   |                                         |                |                                                                                                                                                                                                                                                                                                                                                                                                      |
| CXCR4   |                                         |                |                                                                                                                                                                                                                                                                                                                                                                                                      |
| CYCS    |                                         |                |                                                                                                                                                                                                                                                                                                                                                                                                      |
| CYLC1   |                                         |                |                                                                                                                                                                                                                                                                                                                                                                                                      |
| DCAF17  |                                         |                |                                                                                                                                                                                                                                                                                                                                                                                                      |
| DDIT4   |                                         |                |                                                                                                                                                                                                                                                                                                                                                                                                      |
| DDO     | D-aspartate oxidase                     | NM_004032.2    | hsa00250, hsa04146                                                                                                                                                                                                                                                                                                                                                                                   |
| DDX58   | DExH/H-box helicase 58                  | NM_014314.3    | hsa04064, hsa04622, hsa04623, hsa05162, hsa05164, hsa05161, hsa05160, hsa05168, hsa05169, hsa04622                                                                                                                                                                                                                                                                                                   |
| DDX60   | DExH/H-box helicase 60                  | NM_017631.5    |                                                                                                                                                                                                                                                                                                                                                                                                      |
| DDX60L  | DExH/H-box 60 like                      | NM_001012967.2 |                                                                                                                                                                                                                                                                                                                                                                                                      |
| DEFB110 |                                         |                |                                                                                                                                                                                                                                                                                                                                                                                                      |
| DHH     |                                         |                |                                                                                                                                                                                                                                                                                                                                                                                                      |
| DHX58   | DExH-box helicase 58                    | NM_024119.2    | hsa04622                                                                                                                                                                                                                                                                                                                                                                                             |
| DHX8    |                                         |                |                                                                                                                                                                                                                                                                                                                                                                                                      |
| DICER1  |                                         |                |                                                                                                                                                                                                                                                                                                                                                                                                      |
| DNAH8   |                                         |                |                                                                                                                                                                                                                                                                                                                                                                                                      |
| DNAJB14 |                                         |                |                                                                                                                                                                                                                                                                                                                                                                                                      |
| DNAJC10 |                                         |                |                                                                                                                                                                                                                                                                                                                                                                                                      |
| DPYD    |                                         |                |                                                                                                                                                                                                                                                                                                                                                                                                      |
| DPYS    |                                         |                |                                                                                                                                                                                                                                                                                                                                                                                                      |

|                                                             |                                                           |                |                                                                                                                                                                                                                                                                                                                                                                                                                                              |
|-------------------------------------------------------------|-----------------------------------------------------------|----------------|----------------------------------------------------------------------------------------------------------------------------------------------------------------------------------------------------------------------------------------------------------------------------------------------------------------------------------------------------------------------------------------------------------------------------------------------|
| DTX3L<br>DUOX2<br>EDN1                                      | deltex E3 ubiquitin ligase 3L                             | NM_138287.3    | hsa04330                                                                                                                                                                                                                                                                                                                                                                                                                                     |
| EGF                                                         | epidermal growth factor                                   | NM_001963.5    | hsa04014, hsa04015, hsa04010, hsa04012, hsa04630, hsa04066, hsa04068, hsa04072, hsa04151, hsa04510, hsa04540, hsa04810, hsa05200, hsa05231, hsa05210, hsa05212, hsa05226, hsa05214, hsa05218, hsa05219, hsa05215, hsa05213, hsa05224, hsa05223, hsa05160, hsa05165, hsa01521                                                                                                                                                                 |
| EGFR                                                        | epidermal growth factor receptor                          | NM_005228.4    | hsa04014, hsa04015, hsa04010, hsa04012, hsa04630, hsa04066, hsa04068, hsa04020, hsa04072, hsa04151, hsa04144, hsa04510, hsa04520, hsa04540, hsa04810, hsa04912, hsa04915, hsa04921, hsa04926, hsa04928, hsa05200, hsa05230, hsa05231, hsa05206, hsa05205, hsa05210, hsa05212, hsa05225, hsa05226, hsa05214, hsa05218, hsa05219, hsa05215, hsa05213, hsa05224, hsa05223, hsa04934, hsa05120, hsa05160, hsa05163, hsa05165, hsa01521, hsa01522 |
| EGR1<br>EHHADH<br>EHMT1<br>EHMT2<br>EID3                    | euchromatic histone lysine methyltransferase 1            | NM_024757.4    | hsa00310, hsa04211                                                                                                                                                                                                                                                                                                                                                                                                                           |
|                                                             | euchromatic histone lysine methyltransferase 2            | NM_001289413.1 | hsa00310, hsa04211                                                                                                                                                                                                                                                                                                                                                                                                                           |
| EIF2AK2<br>EML6<br>ENO2                                     | eukaryotic translation initiation factor 2 alpha kinase 2 | NM_002759.3    | hsa04141, hsa04217, hsa05203, hsa05162, hsa05164, hsa05160, hsa05168, hsa05167, hsa05169, hsa05165                                                                                                                                                                                                                                                                                                                                           |
| EP300                                                       | E1A binding protein p300                                  | NM_001429.3    | hsa04310, hsa04330, hsa04350, hsa04630, hsa04066, hsa04068, hsa04024, hsa04110, hsa04520, hsa04922, hsa04919, hsa04916, hsa04720, hsa05200, hsa05206, hsa05203, hsa05211, hsa05215, hsa05016, hsa05152, hsa05166, hsa05164, hsa05161, hsa05168, hsa05167, hsa05169, hsa05165                                                                                                                                                                 |
| EPRS<br>EPSTI1<br>ESM1<br>ESR1<br>ETV7<br>EZH2<br>F2R<br>F3 | epithelial stromal interaction 1                          | NM_001002264.3 |                                                                                                                                                                                                                                                                                                                                                                                                                                              |
|                                                             | endothelial cell specific molecule 1                      | NM_007036.4    |                                                                                                                                                                                                                                                                                                                                                                                                                                              |
|                                                             | estrogen receptor 1                                       | NM_000125.3    | hsa04915, hsa04917, hsa04919, hsa04961, hsa05200, hsa05205, hsa05224, hsa01522                                                                                                                                                                                                                                                                                                                                                               |
| FAM183B<br>FAM43A<br>FAM46A<br>FAM83E                       | coagulation factor III, tissue factor                     | NM_001993.4    | hsa04610, hsa04933                                                                                                                                                                                                                                                                                                                                                                                                                           |
|                                                             | family with sequence similarity 43 member A               | NM_153690.4    |                                                                                                                                                                                                                                                                                                                                                                                                                                              |
|                                                             | terminal nucleotidyltransferase 5A                        | NM_017633.2    |                                                                                                                                                                                                                                                                                                                                                                                                                                              |
| FAS                                                         | Fas cell surface death receptor                           | NM_000043.5    | hsa04010, hsa04668, hsa04060, hsa04210, hsa04217, hsa04115, hsa04650, hsa05200, hsa05205, hsa05320, hsa05330, hsa05332, hsa05010, hsa04940, hsa04932, hsa05162, hsa05164, hsa05161, hsa05168, hsa05163, hsa05167, hsa05165, hsa05142, hsa05143, hsa01524                                                                                                                                                                                     |
| FCGR3B<br>FGF14                                             |                                                           |                |                                                                                                                                                                                                                                                                                                                                                                                                                                              |
| FGF2                                                        | fibroblast growth factor 2                                | NM_002006.5    | hsa04014, hsa04015, hsa04010, hsa04151, hsa04550, hsa04810, hsa05200, hsa05205, hsa05226, hsa05218, hsa05224, hsa05167, hsa01521                                                                                                                                                                                                                                                                                                             |
| FLJ42393<br>FLNA<br>FOS<br>FST<br>FURIN<br>FYN              | follicle-stimulating hormone receptor (FST)               | NM_006350.3    | hsa04350                                                                                                                                                                                                                                                                                                                                                                                                                                     |
| GAPDH<br>GART<br>GAS2L3                                     | glyceraldehyde-3-phosphate dehydrogenase                  | NM_002046.6    | hsa00010, hsa04066, hsa05010                                                                                                                                                                                                                                                                                                                                                                                                                 |
|                                                             | phosphoribosylaminoimidazole synthetase (GART)            | NM_000819.4    | hsa00230, hsa00670, hsa01523                                                                                                                                                                                                                                                                                                                                                                                                                 |
| GBP1<br>GBP2<br>GBP3<br>GBP5<br>GLDC<br>GLS                 | guanylate binding protein 1                               | NM_002053.2    | hsa04621                                                                                                                                                                                                                                                                                                                                                                                                                                     |
|                                                             | guanylate binding protein 2                               | NM_004120.4    | hsa04621                                                                                                                                                                                                                                                                                                                                                                                                                                     |
|                                                             | guanylate binding protein 3                               | NM_018284.2    | hsa04621                                                                                                                                                                                                                                                                                                                                                                                                                                     |
|                                                             | guanylate binding protein 5                               | NM_001134486.2 | hsa04621                                                                                                                                                                                                                                                                                                                                                                                                                                     |
| GMPR<br>GMPS<br>GNAI2<br>GNAL<br>GNAT3<br>GNB2              | guanosine monophosphate reductase                         | NM_006877.3    | hsa00230                                                                                                                                                                                                                                                                                                                                                                                                                                     |
|                                                             | guanine monophosphate synthase                            | NM_003875.2    | hsa00230, hsa00983                                                                                                                                                                                                                                                                                                                                                                                                                           |
|                                                             | G protein subunit alpha L                                 | NM_182978.3    | hsa04020, hsa04728, hsa04740, hsa05012, hsa05146, hsa05142                                                                                                                                                                                                                                                                                                                                                                                   |
| GNB4                                                        | G protein subunit beta 4                                  | NM_021629.3    | hsa04014, hsa04371, hsa04151, hsa04062, hsa04926, hsa04724, hsa04727, hsa04725, hsa04728, hsa04726, hsa04723, hsa04713, hsa05200, hsa05032, hsa05034, hsa05163, hsa05167                                                                                                                                                                                                                                                                     |
| GNG13<br>GNG4                                               | G protein subunit gamma 13                                | NM_016541.2    | hsa04014, hsa04371, hsa04151, hsa04062, hsa04926, hsa04724, hsa04727, hsa04725, hsa04728, hsa04726, hsa04723, hsa04740, hsa04742, hsa04713, hsa05200, hsa05032, hsa05034, hsa05163, hsa05167                                                                                                                                                                                                                                                 |
| GNG7                                                        | G protein subunit gamma 7                                 | NM_052847.2    | hsa04014, hsa04371, hsa04151, hsa04062, hsa04926, hsa04724, hsa04727, hsa04725, hsa04728, hsa04726, hsa04723, hsa04740, hsa04713, hsa05200, hsa05032, hsa05034, hsa05163, hsa05167                                                                                                                                                                                                                                                           |
| GNGT1                                                       | G protein subunit gamma transducin 1                      | NM_021955.4    | hsa04014, hsa04371, hsa04151, hsa04062, hsa04926, hsa04724, hsa04727, hsa04725, hsa04728, hsa04726, hsa04723, hsa04744, hsa04713, hsa05200, hsa05032, hsa05034, hsa05163, hsa05167                                                                                                                                                                                                                                                           |
| GPR37<br>GRB2<br>GRP<br>GSK3B<br>H2AFB2<br>H2AFV<br>HACE1   |                                                           |                |                                                                                                                                                                                                                                                                                                                                                                                                                                              |

|           |                                                          |                |                                                                                                                                                                                                                                                                                                                                                                                                                                                                                                                                                                                                                                                                                                                                                                    |
|-----------|----------------------------------------------------------|----------------|--------------------------------------------------------------------------------------------------------------------------------------------------------------------------------------------------------------------------------------------------------------------------------------------------------------------------------------------------------------------------------------------------------------------------------------------------------------------------------------------------------------------------------------------------------------------------------------------------------------------------------------------------------------------------------------------------------------------------------------------------------------------|
| HAO1      |                                                          |                |                                                                                                                                                                                                                                                                                                                                                                                                                                                                                                                                                                                                                                                                                                                                                                    |
| HAS2      | hyaluronan synthase 2                                    | NM_005328.2    |                                                                                                                                                                                                                                                                                                                                                                                                                                                                                                                                                                                                                                                                                                                                                                    |
| HCK       |                                                          |                |                                                                                                                                                                                                                                                                                                                                                                                                                                                                                                                                                                                                                                                                                                                                                                    |
| HDAC1     |                                                          |                |                                                                                                                                                                                                                                                                                                                                                                                                                                                                                                                                                                                                                                                                                                                                                                    |
| HDAC2     |                                                          |                |                                                                                                                                                                                                                                                                                                                                                                                                                                                                                                                                                                                                                                                                                                                                                                    |
| HDX       |                                                          |                |                                                                                                                                                                                                                                                                                                                                                                                                                                                                                                                                                                                                                                                                                                                                                                    |
| HECW2     |                                                          |                |                                                                                                                                                                                                                                                                                                                                                                                                                                                                                                                                                                                                                                                                                                                                                                    |
| HERC5     | HECT and RLD domain containing E3 ubiquitin protei       | NM_016323.3    |                                                                                                                                                                                                                                                                                                                                                                                                                                                                                                                                                                                                                                                                                                                                                                    |
| HERC6     | HECT and RLD domain containing E3 ubiquitin protei       | NM_017912.3    |                                                                                                                                                                                                                                                                                                                                                                                                                                                                                                                                                                                                                                                                                                                                                                    |
| HIST1H2AA |                                                          |                |                                                                                                                                                                                                                                                                                                                                                                                                                                                                                                                                                                                                                                                                                                                                                                    |
| HIST1H2BA |                                                          |                |                                                                                                                                                                                                                                                                                                                                                                                                                                                                                                                                                                                                                                                                                                                                                                    |
| HIST1H2BL |                                                          |                |                                                                                                                                                                                                                                                                                                                                                                                                                                                                                                                                                                                                                                                                                                                                                                    |
| HIST2H2AC |                                                          |                |                                                                                                                                                                                                                                                                                                                                                                                                                                                                                                                                                                                                                                                                                                                                                                    |
| HIST2H2BE |                                                          |                |                                                                                                                                                                                                                                                                                                                                                                                                                                                                                                                                                                                                                                                                                                                                                                    |
| HLA-A     | major histocompatibility complex, class I, A             | NM_002116.7    | hsa04514, hsa04144, hsa04145, hsa04218, hsa04650, hsa04612, hsa05203, hsa05320, hsa05330, hsa05332, hsa05416, hsa04940, hsa05166, hsa05168, hsa05163, hsa05167, hsa05169, hsa05165                                                                                                                                                                                                                                                                                                                                                                                                                                                                                                                                                                                 |
| HLA-B     | major histocompatibility complex, class I, B (HLA-B)     | NM_005514.7    | hsa04514, hsa04144, hsa04145, hsa04218, hsa04650, hsa04612, hsa05203, hsa05320, hsa05330, hsa05332, hsa05416, hsa04940, hsa05166, hsa05168, hsa05163, hsa05167, hsa05169, hsa05165                                                                                                                                                                                                                                                                                                                                                                                                                                                                                                                                                                                 |
| HLA-C     | major histocompatibility complex, class I, C             | NM_002117.5    | hsa04514, hsa04144, hsa04145, hsa04218, hsa04650, hsa04612, hsa05203, hsa05320, hsa05330, hsa05332, hsa05416, hsa04940, hsa05166, hsa05168, hsa05163, hsa05167, hsa05169, hsa05165                                                                                                                                                                                                                                                                                                                                                                                                                                                                                                                                                                                 |
| HLA-E     |                                                          |                |                                                                                                                                                                                                                                                                                                                                                                                                                                                                                                                                                                                                                                                                                                                                                                    |
| HLA-F     | major histocompatibility complex, class I, F             | NM_001098479.1 | hsa04514, hsa04144, hsa04145, hsa04218, hsa04650, hsa04612, hsa05203, hsa05320, hsa05330, hsa05332, hsa05416, hsa04940, hsa05166, hsa05168, hsa05163, hsa05167, hsa05169, hsa05165                                                                                                                                                                                                                                                                                                                                                                                                                                                                                                                                                                                 |
| HMSD      |                                                          |                |                                                                                                                                                                                                                                                                                                                                                                                                                                                                                                                                                                                                                                                                                                                                                                    |
| HOXA10    |                                                          |                |                                                                                                                                                                                                                                                                                                                                                                                                                                                                                                                                                                                                                                                                                                                                                                    |
| HRAS      | HRas proto-oncogene, GTPase                              | NM_005343.3    | hsa04014, hsa04015, hsa04010, hsa04012, hsa04370, hsa04371, hsa04630, hsa04068, hsa04072, hsa04071, hsa04151, hsa04150, hsa04144, hsa04140, hsa04137, hsa04210, hsa04218, hsa04510, hsa04540, hsa04550, hsa04810, hsa04625, hsa04650, hsa04660, hsa04662, hsa04664, hsa04062, hsa04910, hsa04912, hsa04915, hsa04917, hsa04921, hsa04926, hsa04919, hsa04916, hsa04725, hsa04726, hsa04720, hsa04730, hsa04722, hsa04360, hsa04211, hsa04213, hsa04714, hsa05200, hsa05230, hsa05231, hsa05206, hsa05205, hsa05203, hsa05210, hsa05225, hsa05226, hsa05214, hsa05216, hsa05221, hsa05220, hsa05218, hsa05211, hsa05219, hsa05215, hsa05213, hsa05224, hsa05223, hsa05034, hsa04933, hsa05166, hsa05161, hsa05160, hsa05163, hsa05167, hsa05165, hsa01521, hsa01522 |
| HSP90AA1  | heat shock protein 90 alpha family class A member 1      | NM_001017963.2 | hsa04141, hsa04151, hsa04217, hsa04621, hsa04612, hsa04659, hsa04657, hsa04915, hsa04914, hsa05200, hsa05215, hsa05418                                                                                                                                                                                                                                                                                                                                                                                                                                                                                                                                                                                                                                             |
| HSP90AB1  |                                                          |                |                                                                                                                                                                                                                                                                                                                                                                                                                                                                                                                                                                                                                                                                                                                                                                    |
| HSPA1A    |                                                          |                |                                                                                                                                                                                                                                                                                                                                                                                                                                                                                                                                                                                                                                                                                                                                                                    |
| HSPA4     |                                                          |                |                                                                                                                                                                                                                                                                                                                                                                                                                                                                                                                                                                                                                                                                                                                                                                    |
| HSPA4L    |                                                          |                |                                                                                                                                                                                                                                                                                                                                                                                                                                                                                                                                                                                                                                                                                                                                                                    |
| HSPA5     |                                                          |                |                                                                                                                                                                                                                                                                                                                                                                                                                                                                                                                                                                                                                                                                                                                                                                    |
| HSPA6     | heat shock protein family A (Hsp70) member 6             | NM_002155.4    | hsa03040, hsa04141, hsa04010, hsa04144, hsa04612, hsa04915, hsa04213, hsa05134, hsa05162, hsa05164, hsa05169, hsa05145                                                                                                                                                                                                                                                                                                                                                                                                                                                                                                                                                                                                                                             |
| ISPA6     | heat shock protein family A (Hsp70) member 6             | NM_002155.4    | hsa03040, hsa04141, hsa04010, hsa04144, hsa04612, hsa04915, hsa04213, hsa05134, hsa05162, hsa05164, hsa05169, hsa05145                                                                                                                                                                                                                                                                                                                                                                                                                                                                                                                                                                                                                                             |
| HSPA8     |                                                          |                |                                                                                                                                                                                                                                                                                                                                                                                                                                                                                                                                                                                                                                                                                                                                                                    |
| HSPB3     |                                                          |                |                                                                                                                                                                                                                                                                                                                                                                                                                                                                                                                                                                                                                                                                                                                                                                    |
| HTR2B     |                                                          |                |                                                                                                                                                                                                                                                                                                                                                                                                                                                                                                                                                                                                                                                                                                                                                                    |
| ICAM1     |                                                          |                |                                                                                                                                                                                                                                                                                                                                                                                                                                                                                                                                                                                                                                                                                                                                                                    |
| IDO1      | indoleamine 2,3-dioxygenase 1                            | NM_002164.5    | hsa00380, hsa05143                                                                                                                                                                                                                                                                                                                                                                                                                                                                                                                                                                                                                                                                                                                                                 |
| IFI16     | interferon gamma inducible protein 16                    | NM_001206567.1 | hsa047621                                                                                                                                                                                                                                                                                                                                                                                                                                                                                                                                                                                                                                                                                                                                                          |
| IFI27     | interferon alpha inducible protein 27                    | NM_001130080.2 |                                                                                                                                                                                                                                                                                                                                                                                                                                                                                                                                                                                                                                                                                                                                                                    |
| IFI35     | interferon induced protein 35                            | NM_005533.4    |                                                                                                                                                                                                                                                                                                                                                                                                                                                                                                                                                                                                                                                                                                                                                                    |
| IFI44     | interferon induced protein 44                            | NM_006417.4    |                                                                                                                                                                                                                                                                                                                                                                                                                                                                                                                                                                                                                                                                                                                                                                    |
| IFI44L    | interferon induced protein 44 like                       | NM_006820.3    |                                                                                                                                                                                                                                                                                                                                                                                                                                                                                                                                                                                                                                                                                                                                                                    |
| IFI6      | interferon alpha inducible protein 6                     | NM_002038.3    |                                                                                                                                                                                                                                                                                                                                                                                                                                                                                                                                                                                                                                                                                                                                                                    |
| IFIH1     | interferon induced with helicase C domain 1              | NM_022168.4    |                                                                                                                                                                                                                                                                                                                                                                                                                                                                                                                                                                                                                                                                                                                                                                    |
| IFIT1     | interferon induced protein with tetratricopeptide repeat | NM_001548.4    | hsa05160, hsa05168                                                                                                                                                                                                                                                                                                                                                                                                                                                                                                                                                                                                                                                                                                                                                 |
| IFIT2     | interferon induced protein with tetratricopeptide repeat | NM_001547.4    |                                                                                                                                                                                                                                                                                                                                                                                                                                                                                                                                                                                                                                                                                                                                                                    |
| IFIT3     | interferon induced protein with tetratricopeptide repeat | NM_001549.5    |                                                                                                                                                                                                                                                                                                                                                                                                                                                                                                                                                                                                                                                                                                                                                                    |
| IFIT5     | interferon induced protein with tetratricopeptide repeat | NM_012420.2    |                                                                                                                                                                                                                                                                                                                                                                                                                                                                                                                                                                                                                                                                                                                                                                    |
| IFITM1    | interferon induced transmembrane protein 1               | NM_003641.3    | hsa04662                                                                                                                                                                                                                                                                                                                                                                                                                                                                                                                                                                                                                                                                                                                                                           |
| IFNA10    |                                                          |                |                                                                                                                                                                                                                                                                                                                                                                                                                                                                                                                                                                                                                                                                                                                                                                    |
| IFNA16    | interferon alpha 16                                      | NM_002173.3    | hsa04630, hsa04151, hsa04060, hsa04217, hsa04620, hsa04621, hsa04622, hsa04623, hsa04650, hsa05200, hsa05320, hsa05152, hsa05162, hsa05164, hsa05161, hsa05160, hsa05168, hsa05163, hsa05167, hsa05165                                                                                                                                                                                                                                                                                                                                                                                                                                                                                                                                                             |
| IFNA17    | interferon alpha 17                                      | NM_021268.2    | hsa04630, hsa04151, hsa04060, hsa04217, hsa04620, hsa04621, hsa04622, hsa04623, hsa04650, hsa05200, hsa05320, hsa05152, hsa05162, hsa05164, hsa05161, hsa05160, hsa05168, hsa05163, hsa05167, hsa05165                                                                                                                                                                                                                                                                                                                                                                                                                                                                                                                                                             |
| IFNB1     | interferon beta 1                                        | NM_002176.3    | hsa04630, hsa04668, hsa04151, hsa04060, hsa04217, hsa04620, hsa04621, hsa04622, hsa04623, hsa04650, hsa04380, hsa05152, hsa05162, hsa05164, hsa05161, hsa05160, hsa05168, hsa05163, hsa05167, hsa05165, hsa05142                                                                                                                                                                                                                                                                                                                                                                                                                                                                                                                                                   |
| IFNG      |                                                          |                |                                                                                                                                                                                                                                                                                                                                                                                                                                                                                                                                                                                                                                                                                                                                                                    |
| IGF1      |                                                          |                |                                                                                                                                                                                                                                                                                                                                                                                                                                                                                                                                                                                                                                                                                                                                                                    |
| IGLL3P    |                                                          |                |                                                                                                                                                                                                                                                                                                                                                                                                                                                                                                                                                                                                                                                                                                                                                                    |
| IL10      |                                                          |                |                                                                                                                                                                                                                                                                                                                                                                                                                                                                                                                                                                                                                                                                                                                                                                    |
| IL15      | interleukin 15                                           | NM_172175.2    | hsa04630, hsa04668, hsa04060, hsa04672, hsa05200, hsa05323, hsa05166, hsa05168                                                                                                                                                                                                                                                                                                                                                                                                                                                                                                                                                                                                                                                                                     |
| IL18      |                                                          |                |                                                                                                                                                                                                                                                                                                                                                                                                                                                                                                                                                                                                                                                                                                                                                                    |

|           |                                                        |                |                                                                                                                                                                                                                                                                                                                                                                                                                                                                                                                                                                                                                                                                                                                                                                                                                                                                                                                                                                                                                                                                                |
|-----------|--------------------------------------------------------|----------------|--------------------------------------------------------------------------------------------------------------------------------------------------------------------------------------------------------------------------------------------------------------------------------------------------------------------------------------------------------------------------------------------------------------------------------------------------------------------------------------------------------------------------------------------------------------------------------------------------------------------------------------------------------------------------------------------------------------------------------------------------------------------------------------------------------------------------------------------------------------------------------------------------------------------------------------------------------------------------------------------------------------------------------------------------------------------------------|
| IL1B      | interleukin 1-beta                                     | NM_000576.2    | hsa04010, hsa04064, hsa04668, hsa04060, hsa04217, hsa04640, hsa04620, hsa04621, hsa04623, hsa04625, hsa04659, hsa04657, hsa04750, hsa04380, hsa05323, hsa05321, hsa05332, hsa05010, hsa05020, hsa05418, hsa04940, hsa04932, hsa04933, hsa05132, hsa05133, hsa05134, hsa05152, hsa05162, hsa05164, hsa05168, hsa05163, hsa05146, hsa05144, hsa05140, hsa05142, hsa05143, hsa01523                                                                                                                                                                                                                                                                                                                                                                                                                                                                                                                                                                                                                                                                                               |
| IL2       |                                                        |                |                                                                                                                                                                                                                                                                                                                                                                                                                                                                                                                                                                                                                                                                                                                                                                                                                                                                                                                                                                                                                                                                                |
| IL28A     |                                                        |                |                                                                                                                                                                                                                                                                                                                                                                                                                                                                                                                                                                                                                                                                                                                                                                                                                                                                                                                                                                                                                                                                                |
| IL29      | interleukin 29/interferon lambda 1                     | NM_172140.1    |                                                                                                                                                                                                                                                                                                                                                                                                                                                                                                                                                                                                                                                                                                                                                                                                                                                                                                                                                                                                                                                                                |
| IL4       |                                                        |                |                                                                                                                                                                                                                                                                                                                                                                                                                                                                                                                                                                                                                                                                                                                                                                                                                                                                                                                                                                                                                                                                                |
| IL41I     |                                                        |                |                                                                                                                                                                                                                                                                                                                                                                                                                                                                                                                                                                                                                                                                                                                                                                                                                                                                                                                                                                                                                                                                                |
| IL6       | interleukin 6                                          | NM_000600.4    | hsa04630, hsa04668, hsa04066, hsa04068, hsa04151, hsa04060, hsa04218, hsa04640, hsa04620, hsa04621, hsa04623, hsa04625, hsa04659, hsa04657, hsa04672, hsa05200, hsa05202, hsa05323, hsa05321, hsa05332, hsa05020, hsa05410, hsa04932, hsa04931, hsa04933, hsa05132, hsa05133, hsa05134, hsa05152, hsa05166, hsa05162, hsa05164, hsa05161, hsa05168, hsa05163, hsa05167, hsa05146, hsa05144, hsa05142, hsa05143, hsa01521, hsa01523                                                                                                                                                                                                                                                                                                                                                                                                                                                                                                                                                                                                                                             |
| IL7R      | interleukin 7 receptor                                 | NM_002185.4    | hsa04630, hsa04068, hsa04151, hsa04060, hsa04640, hsa05200, hsa05340                                                                                                                                                                                                                                                                                                                                                                                                                                                                                                                                                                                                                                                                                                                                                                                                                                                                                                                                                                                                           |
| IMPDH2    | inosine monophosphate dehydrogenase 2                  | NM_000884.2    | hsa00230, hsa00983                                                                                                                                                                                                                                                                                                                                                                                                                                                                                                                                                                                                                                                                                                                                                                                                                                                                                                                                                                                                                                                             |
| INHBE     |                                                        |                |                                                                                                                                                                                                                                                                                                                                                                                                                                                                                                                                                                                                                                                                                                                                                                                                                                                                                                                                                                                                                                                                                |
| IRF1      | interferon regulatory factor 1                         | NM_002198.2    | hsa04668, hsa04625, hsa04917, hsa05133, hsa05160, hsa05165                                                                                                                                                                                                                                                                                                                                                                                                                                                                                                                                                                                                                                                                                                                                                                                                                                                                                                                                                                                                                     |
| IRF2      | interferon regulatory factor 2                         | NM_002199.3    |                                                                                                                                                                                                                                                                                                                                                                                                                                                                                                                                                                                                                                                                                                                                                                                                                                                                                                                                                                                                                                                                                |
| IRF7      | interferon regulatory factor 7                         | NM_001572.4    | hsa04620, hsa04621, hsa04622, hsa04623, hsa05203, hsa05162, hsa05164, hsa05161, hsa05160, hsa05168, hsa05167                                                                                                                                                                                                                                                                                                                                                                                                                                                                                                                                                                                                                                                                                                                                                                                                                                                                                                                                                                   |
| IRF9      | interferon regulatory factor 9                         | NM_006084.4    | hsa04630, hsa04217, hsa04621, hsa04625, hsa04380, hsa05203, hsa05162, hsa05164, hsa05160, hsa05168, hsa05167, hsa05165                                                                                                                                                                                                                                                                                                                                                                                                                                                                                                                                                                                                                                                                                                                                                                                                                                                                                                                                                         |
| IRS2      |                                                        |                |                                                                                                                                                                                                                                                                                                                                                                                                                                                                                                                                                                                                                                                                                                                                                                                                                                                                                                                                                                                                                                                                                |
| ISG15     | ISG15 ubiquitin-like modifier                          | NM_005101.4    | hsa04622, hsa05165                                                                                                                                                                                                                                                                                                                                                                                                                                                                                                                                                                                                                                                                                                                                                                                                                                                                                                                                                                                                                                                             |
| ISG20     | interferon stimulated exonuclease gene 20              | NM_002201.5    |                                                                                                                                                                                                                                                                                                                                                                                                                                                                                                                                                                                                                                                                                                                                                                                                                                                                                                                                                                                                                                                                                |
| ISPD      |                                                        |                |                                                                                                                                                                                                                                                                                                                                                                                                                                                                                                                                                                                                                                                                                                                                                                                                                                                                                                                                                                                                                                                                                |
| ITGA2     |                                                        |                |                                                                                                                                                                                                                                                                                                                                                                                                                                                                                                                                                                                                                                                                                                                                                                                                                                                                                                                                                                                                                                                                                |
| ITGB1     |                                                        |                |                                                                                                                                                                                                                                                                                                                                                                                                                                                                                                                                                                                                                                                                                                                                                                                                                                                                                                                                                                                                                                                                                |
| ITGB2     |                                                        |                |                                                                                                                                                                                                                                                                                                                                                                                                                                                                                                                                                                                                                                                                                                                                                                                                                                                                                                                                                                                                                                                                                |
| JAK1      |                                                        |                |                                                                                                                                                                                                                                                                                                                                                                                                                                                                                                                                                                                                                                                                                                                                                                                                                                                                                                                                                                                                                                                                                |
| JAK2      | Janus kinase 2                                         | NM_004972.3    | hsa04630, hsa04151, hsa04217, hsa04550, hsa04658, hsa04659, hsa04062, hsa04920, hsa04917, hsa04725, hsa05200, hsa04933, hsa05152, hsa05162, hsa05164, hsa05168, hsa05167, hsa05145, hsa05140, hsa01521                                                                                                                                                                                                                                                                                                                                                                                                                                                                                                                                                                                                                                                                                                                                                                                                                                                                         |
| JAKMIP2   |                                                        |                |                                                                                                                                                                                                                                                                                                                                                                                                                                                                                                                                                                                                                                                                                                                                                                                                                                                                                                                                                                                                                                                                                |
| JUN       | Jun proto-oncogene, AP-1 transcription factor subunit  | NM_002228.3    | hsa04010, hsa04012, hsa04310, hsa04668, hsa04024, hsa04137, hsa04210, hsa04510, hsa04530, hsa04620, hsa04621, hsa04625, hsa04660, hsa04658, hsa04659, hsa04657, hsa04662, hsa04912, hsa04915, hsa04921, hsa04926, hsa04722, hsa04380, hsa05200, hsa05231, hsa05203, hsa05210, hsa05211, hsa05224, hsa05323, hsa05321, hsa05030, hsa05031, hsa05418, hsa04932, hsa04933, hsa05120, hsa05132, hsa05133, hsa05166, hsa05164, hsa05161, hsa05168, hsa05167, hsa05169, hsa05140, hsa05142, hsa01522                                                                                                                                                                                                                                                                                                                                                                                                                                                                                                                                                                                 |
| KCNQ1OT1  |                                                        |                |                                                                                                                                                                                                                                                                                                                                                                                                                                                                                                                                                                                                                                                                                                                                                                                                                                                                                                                                                                                                                                                                                |
| KCNV1     | potassium voltage-gated channel modifier subfamily V   | NM_014379.3    |                                                                                                                                                                                                                                                                                                                                                                                                                                                                                                                                                                                                                                                                                                                                                                                                                                                                                                                                                                                                                                                                                |
| KIAA0319  |                                                        |                |                                                                                                                                                                                                                                                                                                                                                                                                                                                                                                                                                                                                                                                                                                                                                                                                                                                                                                                                                                                                                                                                                |
| KIAA0754  |                                                        |                |                                                                                                                                                                                                                                                                                                                                                                                                                                                                                                                                                                                                                                                                                                                                                                                                                                                                                                                                                                                                                                                                                |
| KIT       | KIT proto-oncogene receptor tyrosine kinase            | NM_000222.2    | hsa04014, hsa04015, hsa04010, hsa04072, hsa04151, hsa04640, hsa04916, hsa05200, hsa05230, hsa05221, hsa05224                                                                                                                                                                                                                                                                                                                                                                                                                                                                                                                                                                                                                                                                                                                                                                                                                                                                                                                                                                   |
| KLF4      | Kruppel like factor 4                                  | NM_001314052.1 | hsa04550                                                                                                                                                                                                                                                                                                                                                                                                                                                                                                                                                                                                                                                                                                                                                                                                                                                                                                                                                                                                                                                                       |
| KLHDC7A   |                                                        |                |                                                                                                                                                                                                                                                                                                                                                                                                                                                                                                                                                                                                                                                                                                                                                                                                                                                                                                                                                                                                                                                                                |
| KRAS      |                                                        |                |                                                                                                                                                                                                                                                                                                                                                                                                                                                                                                                                                                                                                                                                                                                                                                                                                                                                                                                                                                                                                                                                                |
| KRTAP17-1 |                                                        |                |                                                                                                                                                                                                                                                                                                                                                                                                                                                                                                                                                                                                                                                                                                                                                                                                                                                                                                                                                                                                                                                                                |
| KRTAP19-2 |                                                        |                |                                                                                                                                                                                                                                                                                                                                                                                                                                                                                                                                                                                                                                                                                                                                                                                                                                                                                                                                                                                                                                                                                |
| KRTAP21-3 |                                                        |                |                                                                                                                                                                                                                                                                                                                                                                                                                                                                                                                                                                                                                                                                                                                                                                                                                                                                                                                                                                                                                                                                                |
| KRTAP5-10 |                                                        |                |                                                                                                                                                                                                                                                                                                                                                                                                                                                                                                                                                                                                                                                                                                                                                                                                                                                                                                                                                                                                                                                                                |
| KRTAP5-3  |                                                        |                |                                                                                                                                                                                                                                                                                                                                                                                                                                                                                                                                                                                                                                                                                                                                                                                                                                                                                                                                                                                                                                                                                |
| KYNU      | kynureninase                                           | NM_003937.2    | hsa00380                                                                                                                                                                                                                                                                                                                                                                                                                                                                                                                                                                                                                                                                                                                                                                                                                                                                                                                                                                                                                                                                       |
| LAP3      | leucine aminopeptidase 3                               | NM_015907.2    | hsa00330, hsa00480                                                                                                                                                                                                                                                                                                                                                                                                                                                                                                                                                                                                                                                                                                                                                                                                                                                                                                                                                                                                                                                             |
| LBX1      |                                                        |                |                                                                                                                                                                                                                                                                                                                                                                                                                                                                                                                                                                                                                                                                                                                                                                                                                                                                                                                                                                                                                                                                                |
| LCN2      |                                                        |                |                                                                                                                                                                                                                                                                                                                                                                                                                                                                                                                                                                                                                                                                                                                                                                                                                                                                                                                                                                                                                                                                                |
| LEUTX     |                                                        |                |                                                                                                                                                                                                                                                                                                                                                                                                                                                                                                                                                                                                                                                                                                                                                                                                                                                                                                                                                                                                                                                                                |
| LMO2      |                                                        |                |                                                                                                                                                                                                                                                                                                                                                                                                                                                                                                                                                                                                                                                                                                                                                                                                                                                                                                                                                                                                                                                                                |
| LRGUK     | leucine rich repeats and guanylate kinase domain conta | NM_001365700.1 |                                                                                                                                                                                                                                                                                                                                                                                                                                                                                                                                                                                                                                                                                                                                                                                                                                                                                                                                                                                                                                                                                |
| LRRK2     | leucine rich repeat kinase 2                           | NM_198578.3    | hsa00010                                                                                                                                                                                                                                                                                                                                                                                                                                                                                                                                                                                                                                                                                                                                                                                                                                                                                                                                                                                                                                                                       |
| LRRN3     | leucine rich repeat neuronal 3                         | NM_001099660.1 |                                                                                                                                                                                                                                                                                                                                                                                                                                                                                                                                                                                                                                                                                                                                                                                                                                                                                                                                                                                                                                                                                |
| LYN       |                                                        |                |                                                                                                                                                                                                                                                                                                                                                                                                                                                                                                                                                                                                                                                                                                                                                                                                                                                                                                                                                                                                                                                                                |
| LYPD1     | LY6/PLAUR domain containing 1                          | NM_144586.6    | hsa04014, hsa04015, hsa04010, hsa04012, hsa04350, hsa04370, hsa04371, hsa04668, hsa04066, hsa04068, hsa04072, hsa04071, hsa04024, hsa04022, hsa04151, hsa04150, hsa04140, hsa04114, hsa04210, hsa04218, hsa04510, hsa04520, hsa04540, hsa04550, hsa04810, hsa04611, hsa04620, hsa04621, hsa04625, hsa04650, hsa04660, hsa04658, hsa04659, hsa04657, hsa04662, hsa04664, hsa04666, hsa04062, hsa04910, hsa04912, hsa04915, hsa04914, hsa04917, hsa04921, hsa04926, hsa04919, hsa04928, hsa04916, hsa04261, hsa04270, hsa04960, hsa04724, hsa04725, hsa04726, hsa04720, hsa04730, hsa04723, hsa04722, hsa04360, hsa04380, hsa04713, hsa05200, hsa05230, hsa05231, hsa05206, hsa05205, hsa05203, hsa05210, hsa05212, hsa05225, hsa05226, hsa05214, hsa05216, hsa05221, hsa05220, hsa05218, hsa05211, hsa05219, hsa05215, hsa05213, hsa05224, hsa05223, hsa05010, hsa05020, hsa05034, hsa04930, hsa04933, hsa04934, hsa05132, hsa05131, hsa05133, hsa05152, hsa05164, hsa05161, hsa05160, hsa05163, hsa05167, hsa05165, hsa05145, hsa05140, hsa05142, hsa01521, hsa01524, hsa01522 |
| MAPK1     | mitogen-activated protein kinase 1                     | NM_002745.4    |                                                                                                                                                                                                                                                                                                                                                                                                                                                                                                                                                                                                                                                                                                                                                                                                                                                                                                                                                                                                                                                                                |
| MAPK11    |                                                        |                |                                                                                                                                                                                                                                                                                                                                                                                                                                                                                                                                                                                                                                                                                                                                                                                                                                                                                                                                                                                                                                                                                |
| MAPK12    |                                                        |                |                                                                                                                                                                                                                                                                                                                                                                                                                                                                                                                                                                                                                                                                                                                                                                                                                                                                                                                                                                                                                                                                                |

|            |                                                       |                |                                                                                                                                                                                                                                                                                                                                                                                                                                                                                                                                                                                                                                                                                                                                                                                                                                                                                                                                                                                                                                                                                                                                                                                                                                                                                                                                                                                                                                                                                                                                                                           |
|------------|-------------------------------------------------------|----------------|---------------------------------------------------------------------------------------------------------------------------------------------------------------------------------------------------------------------------------------------------------------------------------------------------------------------------------------------------------------------------------------------------------------------------------------------------------------------------------------------------------------------------------------------------------------------------------------------------------------------------------------------------------------------------------------------------------------------------------------------------------------------------------------------------------------------------------------------------------------------------------------------------------------------------------------------------------------------------------------------------------------------------------------------------------------------------------------------------------------------------------------------------------------------------------------------------------------------------------------------------------------------------------------------------------------------------------------------------------------------------------------------------------------------------------------------------------------------------------------------------------------------------------------------------------------------------|
| MAPK14     | mitogen-activated protein kinase 14                   | NM_001315.2    | hsa04015, hsa04010, hsa04370, hsa04668, hsa04068, hsa04071, hsa04218, hsa04550, hsa04611, hsa04620, hsa04621, hsa04622, hsa04625, hsa04660, hsa04658, hsa04659, hsa04657, hsa04664, hsa04670, hsa04912, hsa04914, hsa04917, hsa04926, hsa04261, hsa04728, hsa04723, hsa04722, hsa04750, hsa04380, hsa04714, hsa05205, hsa05014, hsa05418, hsa04933, hsa05120, hsa05132, hsa05131, hsa05133, hsa05152, hsa05164, hsa05160, hsa05163, hsa05167, hsa05169, hsa05145, hsa05140, hsa05142, hsa051522<br>hsa04014, hsa04015, hsa04010, hsa04012, hsa04350, hsa04370, hsa04371, hsa04668, hsa04066, hsa04068, hsa04072, hsa04071, hsa04024, hsa04022, hsa04151, hsa04150, hsa04140, hsa04114, hsa04210, hsa04218, hsa04510, hsa04520, hsa04540, hsa04550, hsa04810, hsa04611, hsa04620, hsa04621, hsa04625, hsa04650, hsa04660, hsa04658, hsa04659, hsa04657, hsa04662, hsa04664, hsa04666, hsa04062, hsa04910, hsa04912, hsa04915, hsa04914, hsa04917, hsa04921, hsa04926, hsa04919, hsa04928, hsa04916, hsa04261, hsa04270, hsa04960, hsa04724, hsa04725, hsa04726, hsa04720, hsa04730, hsa04723, hsa04722, hsa04360, hsa04380, hsa04713, hsa05200, hsa05230, hsa05231, hsa05205, hsa05203, hsa05210, hsa05212, hsa05225, hsa05226, hsa05214, hsa05216, hsa05221, hsa05220, hsa05218, hsa05211, hsa05219, hsa05215, hsa05213, hsa05224, hsa05223, hsa05010, hsa05020, hsa05034, hsa04930, hsa04933, hsa04934, hsa05132, hsa05131, hsa05133, hsa05152, hsa05164, hsa05161, hsa05160, hsa05163, hsa05167, hsa05165, hsa05145, hsa05140, hsa05142, hsa05151, hsa051524, hsa051522 |
| MAPK3      | mitogen-activated protein kinase 3                    | NM_002746.2    |                                                                                                                                                                                                                                                                                                                                                                                                                                                                                                                                                                                                                                                                                                                                                                                                                                                                                                                                                                                                                                                                                                                                                                                                                                                                                                                                                                                                                                                                                                                                                                           |
| MAPK8      |                                                       |                |                                                                                                                                                                                                                                                                                                                                                                                                                                                                                                                                                                                                                                                                                                                                                                                                                                                                                                                                                                                                                                                                                                                                                                                                                                                                                                                                                                                                                                                                                                                                                                           |
| MARCO      |                                                       |                |                                                                                                                                                                                                                                                                                                                                                                                                                                                                                                                                                                                                                                                                                                                                                                                                                                                                                                                                                                                                                                                                                                                                                                                                                                                                                                                                                                                                                                                                                                                                                                           |
| MBOAT4     | membrane bound O-acyltransferase domain containing    | NM_001100916.1 |                                                                                                                                                                                                                                                                                                                                                                                                                                                                                                                                                                                                                                                                                                                                                                                                                                                                                                                                                                                                                                                                                                                                                                                                                                                                                                                                                                                                                                                                                                                                                                           |
| MGP        |                                                       |                |                                                                                                                                                                                                                                                                                                                                                                                                                                                                                                                                                                                                                                                                                                                                                                                                                                                                                                                                                                                                                                                                                                                                                                                                                                                                                                                                                                                                                                                                                                                                                                           |
| MIB1       |                                                       |                |                                                                                                                                                                                                                                                                                                                                                                                                                                                                                                                                                                                                                                                                                                                                                                                                                                                                                                                                                                                                                                                                                                                                                                                                                                                                                                                                                                                                                                                                                                                                                                           |
| MIB2       |                                                       |                |                                                                                                                                                                                                                                                                                                                                                                                                                                                                                                                                                                                                                                                                                                                                                                                                                                                                                                                                                                                                                                                                                                                                                                                                                                                                                                                                                                                                                                                                                                                                                                           |
| MMP1       | matrix metalloproteinase 1                            | NM_002421.3    | hsa04657, hsa03320, hsa04926, hsa05200, hsa05219, hsa05323                                                                                                                                                                                                                                                                                                                                                                                                                                                                                                                                                                                                                                                                                                                                                                                                                                                                                                                                                                                                                                                                                                                                                                                                                                                                                                                                                                                                                                                                                                                |
| MMP2       |                                                       |                |                                                                                                                                                                                                                                                                                                                                                                                                                                                                                                                                                                                                                                                                                                                                                                                                                                                                                                                                                                                                                                                                                                                                                                                                                                                                                                                                                                                                                                                                                                                                                                           |
| MS4A3      |                                                       |                |                                                                                                                                                                                                                                                                                                                                                                                                                                                                                                                                                                                                                                                                                                                                                                                                                                                                                                                                                                                                                                                                                                                                                                                                                                                                                                                                                                                                                                                                                                                                                                           |
| MTHFR      |                                                       |                |                                                                                                                                                                                                                                                                                                                                                                                                                                                                                                                                                                                                                                                                                                                                                                                                                                                                                                                                                                                                                                                                                                                                                                                                                                                                                                                                                                                                                                                                                                                                                                           |
| MTMR8      |                                                       |                |                                                                                                                                                                                                                                                                                                                                                                                                                                                                                                                                                                                                                                                                                                                                                                                                                                                                                                                                                                                                                                                                                                                                                                                                                                                                                                                                                                                                                                                                                                                                                                           |
| MTOR       |                                                       |                |                                                                                                                                                                                                                                                                                                                                                                                                                                                                                                                                                                                                                                                                                                                                                                                                                                                                                                                                                                                                                                                                                                                                                                                                                                                                                                                                                                                                                                                                                                                                                                           |
| MUSK       |                                                       |                |                                                                                                                                                                                                                                                                                                                                                                                                                                                                                                                                                                                                                                                                                                                                                                                                                                                                                                                                                                                                                                                                                                                                                                                                                                                                                                                                                                                                                                                                                                                                                                           |
| MX1        | MX dynamin like GTPase 1                              | NM_001144925.2 | hsa05162, hsa05164, hsa05165                                                                                                                                                                                                                                                                                                                                                                                                                                                                                                                                                                                                                                                                                                                                                                                                                                                                                                                                                                                                                                                                                                                                                                                                                                                                                                                                                                                                                                                                                                                                              |
| MX2        | MX dynamin like GTPase 2                              | NM_002463.1    |                                                                                                                                                                                                                                                                                                                                                                                                                                                                                                                                                                                                                                                                                                                                                                                                                                                                                                                                                                                                                                                                                                                                                                                                                                                                                                                                                                                                                                                                                                                                                                           |
| MYC        | MYC proto-oncogene, bHLH transcription factor         | NM_002467.5    | hsa04010, hsa04012, hsa04310, hsa04350, hsa04390, hsa04630, hsa04151, hsa04110, hsa04218, hsa04550, hsa04919, hsa05200, hsa05230, hsa05202, hsa05206, hsa05205, hsa05210, hsa05225, hsa05226, hsa05216, hsa05221, hsa05220, hsa05219, hsa05213, hsa05224, hsa05222, hsa05166, hsa05161, hsa05163, hsa05167, hsa05169                                                                                                                                                                                                                                                                                                                                                                                                                                                                                                                                                                                                                                                                                                                                                                                                                                                                                                                                                                                                                                                                                                                                                                                                                                                      |
| MYD88      |                                                       |                |                                                                                                                                                                                                                                                                                                                                                                                                                                                                                                                                                                                                                                                                                                                                                                                                                                                                                                                                                                                                                                                                                                                                                                                                                                                                                                                                                                                                                                                                                                                                                                           |
| MYH14      |                                                       |                |                                                                                                                                                                                                                                                                                                                                                                                                                                                                                                                                                                                                                                                                                                                                                                                                                                                                                                                                                                                                                                                                                                                                                                                                                                                                                                                                                                                                                                                                                                                                                                           |
| MYL2       |                                                       |                |                                                                                                                                                                                                                                                                                                                                                                                                                                                                                                                                                                                                                                                                                                                                                                                                                                                                                                                                                                                                                                                                                                                                                                                                                                                                                                                                                                                                                                                                                                                                                                           |
| NAA16      |                                                       |                |                                                                                                                                                                                                                                                                                                                                                                                                                                                                                                                                                                                                                                                                                                                                                                                                                                                                                                                                                                                                                                                                                                                                                                                                                                                                                                                                                                                                                                                                                                                                                                           |
| NANOG      |                                                       |                |                                                                                                                                                                                                                                                                                                                                                                                                                                                                                                                                                                                                                                                                                                                                                                                                                                                                                                                                                                                                                                                                                                                                                                                                                                                                                                                                                                                                                                                                                                                                                                           |
| NCAM1      |                                                       |                |                                                                                                                                                                                                                                                                                                                                                                                                                                                                                                                                                                                                                                                                                                                                                                                                                                                                                                                                                                                                                                                                                                                                                                                                                                                                                                                                                                                                                                                                                                                                                                           |
| NCF2       | neutrophil cytosolic factor 2                         | NM_000433.3    | hsa04145, hsa04670, hsa04380, hsa05418, hsa05140                                                                                                                                                                                                                                                                                                                                                                                                                                                                                                                                                                                                                                                                                                                                                                                                                                                                                                                                                                                                                                                                                                                                                                                                                                                                                                                                                                                                                                                                                                                          |
| NCOA7      |                                                       |                |                                                                                                                                                                                                                                                                                                                                                                                                                                                                                                                                                                                                                                                                                                                                                                                                                                                                                                                                                                                                                                                                                                                                                                                                                                                                                                                                                                                                                                                                                                                                                                           |
| NCRNA00189 |                                                       |                |                                                                                                                                                                                                                                                                                                                                                                                                                                                                                                                                                                                                                                                                                                                                                                                                                                                                                                                                                                                                                                                                                                                                                                                                                                                                                                                                                                                                                                                                                                                                                                           |
| NEDD9      | neural precursor cell expressed, developmentally down | NM_006403.3    |                                                                                                                                                                                                                                                                                                                                                                                                                                                                                                                                                                                                                                                                                                                                                                                                                                                                                                                                                                                                                                                                                                                                                                                                                                                                                                                                                                                                                                                                                                                                                                           |
| NEURL1B    |                                                       |                |                                                                                                                                                                                                                                                                                                                                                                                                                                                                                                                                                                                                                                                                                                                                                                                                                                                                                                                                                                                                                                                                                                                                                                                                                                                                                                                                                                                                                                                                                                                                                                           |
| NFKB1      |                                                       |                |                                                                                                                                                                                                                                                                                                                                                                                                                                                                                                                                                                                                                                                                                                                                                                                                                                                                                                                                                                                                                                                                                                                                                                                                                                                                                                                                                                                                                                                                                                                                                                           |
| NFKBIA     | NFkB inhibitor alpha                                  | NM_020529.2    | hsa04064, hsa04668, hsa04024, hsa04210, hsa04620, hsa04621, hsa04622, hsa04623, hsa04625, hsa04660, hsa04658, hsa04659, hsa04657, hsa04662, hsa04062, hsa04920, hsa04926, hsa04722, hsa04380, hsa05200, hsa05203, hsa05220, hsa05215, hsa05222, hsa04931, hsa05120, hsa05131, hsa05134, hsa05166, hsa05162, hsa05164, hsa05161, hsa05160, hsa05168, hsa05163, hsa05167, hsa05169, hsa05145, hsa05140, hsa05142                                                                                                                                                                                                                                                                                                                                                                                                                                                                                                                                                                                                                                                                                                                                                                                                                                                                                                                                                                                                                                                                                                                                                            |
| NIPSNAP3B  |                                                       |                |                                                                                                                                                                                                                                                                                                                                                                                                                                                                                                                                                                                                                                                                                                                                                                                                                                                                                                                                                                                                                                                                                                                                                                                                                                                                                                                                                                                                                                                                                                                                                                           |
| NLRC5      | NLR family CARD domain containing 5                   | NM_032206.4    |                                                                                                                                                                                                                                                                                                                                                                                                                                                                                                                                                                                                                                                                                                                                                                                                                                                                                                                                                                                                                                                                                                                                                                                                                                                                                                                                                                                                                                                                                                                                                                           |
| NMI        | N-myc and STAT interactor                             | NM_004688.2    |                                                                                                                                                                                                                                                                                                                                                                                                                                                                                                                                                                                                                                                                                                                                                                                                                                                                                                                                                                                                                                                                                                                                                                                                                                                                                                                                                                                                                                                                                                                                                                           |
| NOL4       | nucleolar protein 4                                   | NM_003787.4    |                                                                                                                                                                                                                                                                                                                                                                                                                                                                                                                                                                                                                                                                                                                                                                                                                                                                                                                                                                                                                                                                                                                                                                                                                                                                                                                                                                                                                                                                                                                                                                           |
| NOTCH1     | notch 1                                               | NM_017617.5    | hsa04330, hsa04658, hsa04919, hsa05200, hsa05206, hsa05224, hsa05020, hsa05165, hsa051522                                                                                                                                                                                                                                                                                                                                                                                                                                                                                                                                                                                                                                                                                                                                                                                                                                                                                                                                                                                                                                                                                                                                                                                                                                                                                                                                                                                                                                                                                 |
| NPPC       |                                                       |                |                                                                                                                                                                                                                                                                                                                                                                                                                                                                                                                                                                                                                                                                                                                                                                                                                                                                                                                                                                                                                                                                                                                                                                                                                                                                                                                                                                                                                                                                                                                                                                           |
| NPS        |                                                       |                |                                                                                                                                                                                                                                                                                                                                                                                                                                                                                                                                                                                                                                                                                                                                                                                                                                                                                                                                                                                                                                                                                                                                                                                                                                                                                                                                                                                                                                                                                                                                                                           |
| NR2F1      | nuclear receptor subfamily 2 group F member 1         | NM_005654.5    |                                                                                                                                                                                                                                                                                                                                                                                                                                                                                                                                                                                                                                                                                                                                                                                                                                                                                                                                                                                                                                                                                                                                                                                                                                                                                                                                                                                                                                                                                                                                                                           |
| NR4A2      | nuclear receptor subfamily 4 group A member 2         | NM_006186.3    | hsa04928, hsa04925                                                                                                                                                                                                                                                                                                                                                                                                                                                                                                                                                                                                                                                                                                                                                                                                                                                                                                                                                                                                                                                                                                                                                                                                                                                                                                                                                                                                                                                                                                                                                        |
| NTS        |                                                       |                |                                                                                                                                                                                                                                                                                                                                                                                                                                                                                                                                                                                                                                                                                                                                                                                                                                                                                                                                                                                                                                                                                                                                                                                                                                                                                                                                                                                                                                                                                                                                                                           |
| OAS1       | 2'-5'-oligoadenylate synthetase 1                     | NM_016816.3    | hsa04621, hsa05162, hsa05164, hsa05160, hsa05168                                                                                                                                                                                                                                                                                                                                                                                                                                                                                                                                                                                                                                                                                                                                                                                                                                                                                                                                                                                                                                                                                                                                                                                                                                                                                                                                                                                                                                                                                                                          |
| OAS2       | 2'-5'-oligoadenylate synthetase 2                     | NM_016817.2    | hsa04621, hsa05162, hsa05164, hsa05160, hsa05168                                                                                                                                                                                                                                                                                                                                                                                                                                                                                                                                                                                                                                                                                                                                                                                                                                                                                                                                                                                                                                                                                                                                                                                                                                                                                                                                                                                                                                                                                                                          |
| OAS3       | 2'-5'-oligoadenylate synthetase 3                     | NM_006187.3    | hsa04621, hsa05162, hsa05164, hsa05160, hsa05168                                                                                                                                                                                                                                                                                                                                                                                                                                                                                                                                                                                                                                                                                                                                                                                                                                                                                                                                                                                                                                                                                                                                                                                                                                                                                                                                                                                                                                                                                                                          |
| OASL       | 2'-5'-oligoadenylate synthetase like                  | NM_003733.3    | hsa05165                                                                                                                                                                                                                                                                                                                                                                                                                                                                                                                                                                                                                                                                                                                                                                                                                                                                                                                                                                                                                                                                                                                                                                                                                                                                                                                                                                                                                                                                                                                                                                  |
| OR4K2      |                                                       |                |                                                                                                                                                                                                                                                                                                                                                                                                                                                                                                                                                                                                                                                                                                                                                                                                                                                                                                                                                                                                                                                                                                                                                                                                                                                                                                                                                                                                                                                                                                                                                                           |
| OR5AK2     |                                                       |                |                                                                                                                                                                                                                                                                                                                                                                                                                                                                                                                                                                                                                                                                                                                                                                                                                                                                                                                                                                                                                                                                                                                                                                                                                                                                                                                                                                                                                                                                                                                                                                           |
| P2RY12     |                                                       |                |                                                                                                                                                                                                                                                                                                                                                                                                                                                                                                                                                                                                                                                                                                                                                                                                                                                                                                                                                                                                                                                                                                                                                                                                                                                                                                                                                                                                                                                                                                                                                                           |
| PARP12     | poly(ADP-ribose) polymerase family member 12          | NM_022750.3    |                                                                                                                                                                                                                                                                                                                                                                                                                                                                                                                                                                                                                                                                                                                                                                                                                                                                                                                                                                                                                                                                                                                                                                                                                                                                                                                                                                                                                                                                                                                                                                           |
| PARP14     | poly(ADP-ribose) polymerase family member 14          | NM_017554.2    |                                                                                                                                                                                                                                                                                                                                                                                                                                                                                                                                                                                                                                                                                                                                                                                                                                                                                                                                                                                                                                                                                                                                                                                                                                                                                                                                                                                                                                                                                                                                                                           |
| PARP9      | poly(ADP-ribose) polymerase family member 9           | NM_031458.2    |                                                                                                                                                                                                                                                                                                                                                                                                                                                                                                                                                                                                                                                                                                                                                                                                                                                                                                                                                                                                                                                                                                                                                                                                                                                                                                                                                                                                                                                                                                                                                                           |
| PCDH17     | protocadherin 17                                      | NM_001040429.2 |                                                                                                                                                                                                                                                                                                                                                                                                                                                                                                                                                                                                                                                                                                                                                                                                                                                                                                                                                                                                                                                                                                                                                                                                                                                                                                                                                                                                                                                                                                                                                                           |
| PCGF5      |                                                       |                |                                                                                                                                                                                                                                                                                                                                                                                                                                                                                                                                                                                                                                                                                                                                                                                                                                                                                                                                                                                                                                                                                                                                                                                                                                                                                                                                                                                                                                                                                                                                                                           |
| PCNA       |                                                       |                |                                                                                                                                                                                                                                                                                                                                                                                                                                                                                                                                                                                                                                                                                                                                                                                                                                                                                                                                                                                                                                                                                                                                                                                                                                                                                                                                                                                                                                                                                                                                                                           |
| PDE6C      |                                                       |                |                                                                                                                                                                                                                                                                                                                                                                                                                                                                                                                                                                                                                                                                                                                                                                                                                                                                                                                                                                                                                                                                                                                                                                                                                                                                                                                                                                                                                                                                                                                                                                           |
| PDE9A      |                                                       |                |                                                                                                                                                                                                                                                                                                                                                                                                                                                                                                                                                                                                                                                                                                                                                                                                                                                                                                                                                                                                                                                                                                                                                                                                                                                                                                                                                                                                                                                                                                                                                                           |
| PHF11      | PHD finger protein 11                                 | NM_001040443.2 |                                                                                                                                                                                                                                                                                                                                                                                                                                                                                                                                                                                                                                                                                                                                                                                                                                                                                                                                                                                                                                                                                                                                                                                                                                                                                                                                                                                                                                                                                                                                                                           |
| PHLPP1     | PH domain and leucine rich repeat protein phosphatase | NM_194449.3    | hsa04151                                                                                                                                                                                                                                                                                                                                                                                                                                                                                                                                                                                                                                                                                                                                                                                                                                                                                                                                                                                                                                                                                                                                                                                                                                                                                                                                                                                                                                                                                                                                                                  |

|           |                                                                  |             |                                                                                                                                                                                                                                                                                                                                                                                                                                                                                                                                                                                                                                                                                                                                                                                                                                                                                                                |
|-----------|------------------------------------------------------------------|-------------|----------------------------------------------------------------------------------------------------------------------------------------------------------------------------------------------------------------------------------------------------------------------------------------------------------------------------------------------------------------------------------------------------------------------------------------------------------------------------------------------------------------------------------------------------------------------------------------------------------------------------------------------------------------------------------------------------------------------------------------------------------------------------------------------------------------------------------------------------------------------------------------------------------------|
| PIK3CA    | phosphatidylinositol-4,5-bisphosphate 3-kinase catalytic subunit | NM_006218.3 | hsa00562, hsa04014, hsa04015, hsa04012, hsa04370, hsa04630, hsa04668, hsa04066, hsa04068, hsa04070, hsa04072, hsa04071, hsa04024, hsa04151, hsa04152, hsa04150, hsa04140, hsa04210, hsa04218, hsa04510, hsa04550, hsa04810, hsa04611, hsa04620, hsa04625, hsa04650, hsa04660, hsa04662, hsa04664, hsa04666, hsa04670, hsa04062, hsa04910, hsa04923, hsa04915, hsa04914, hsa04917, hsa04926, hsa04919, hsa04973, hsa04960, hsa04725, hsa04722, hsa04750, hsa04360, hsa04380, hsa04211, hsa04213, hsa05200, hsa05230, hsa05231, hsa05206, hsa05205, hsa05203, hsa05210, hsa05212, hsa05225, hsa05226, hsa05214, hsa05221, hsa05220, hsa05218, hsa05211, hsa05215, hsa05213, hsa05224, hsa05222, hsa05223, hsa05418, hsa04930, hsa04932, hsa04931, hsa04933, hsa05100, hsa05166, hsa05162, hsa05164, hsa05161, hsa05160, hsa05163, hsa05167, hsa05169, hsa05165, hsa05146, hsa05142, hsa01521, hsa01524, hsa01522 |
|           |                                                                  |             | hsa00562, hsa04014, hsa04015, hsa04012, hsa04370, hsa04630, hsa04668, hsa04066, hsa04068, hsa04070, hsa04072, hsa04071, hsa04024, hsa04151, hsa04152, hsa04150, hsa04140, hsa04210, hsa04218, hsa04510, hsa04550, hsa04810, hsa04611, hsa04620, hsa04625, hsa04650, hsa04660, hsa04662, hsa04664, hsa04666, hsa04670, hsa04062, hsa04910, hsa04923, hsa04915, hsa04914, hsa04917, hsa04926, hsa04919, hsa04973, hsa04960, hsa04725, hsa04722, hsa04750, hsa04360, hsa04380, hsa04211, hsa04213, hsa05200, hsa05230, hsa05231, hsa05205, hsa05203, hsa05210, hsa05212, hsa05225, hsa05226, hsa05214, hsa05221, hsa05220, hsa05218, hsa05211, hsa05215, hsa05213, hsa05224, hsa05222, hsa05223, hsa05418, hsa04930, hsa04932, hsa04931, hsa04933, hsa05100, hsa05166, hsa05162, hsa05164, hsa05161, hsa05160, hsa05163, hsa05167, hsa05169, hsa05165, hsa05146, hsa05142, hsa01521, hsa01524, hsa01522           |
| PIK3CB    | phosphatidylinositol-4,5-bisphosphate 3-kinase catalytic subunit | NM_006219.2 | hsa00562, hsa04371, hsa04072, hsa04022, hsa04151, hsa04611, hsa04921, hsa04261, hsa04725, hsa05167, hsa05145                                                                                                                                                                                                                                                                                                                                                                                                                                                                                                                                                                                                                                                                                                                                                                                                   |
| PIK3CD    | phosphatidylinositol-4,5-bisphosphate 3-kinase catalytic subunit | NM_002649.3 | hsa00562, hsa04070, hsa04145, hsa04810                                                                                                                                                                                                                                                                                                                                                                                                                                                                                                                                                                                                                                                                                                                                                                                                                                                                         |
| PIK3CG    | phosphatidylinositol-4,5-bisphosphate 3-kinase catalytic subunit | NM_002649.3 |                                                                                                                                                                                                                                                                                                                                                                                                                                                                                                                                                                                                                                                                                                                                                                                                                                                                                                                |
| PIKFYVE   | phosphoinositide kinase, FYVE-type zinc finger containing        | NM_015040.3 |                                                                                                                                                                                                                                                                                                                                                                                                                                                                                                                                                                                                                                                                                                                                                                                                                                                                                                                |
| PKN1      |                                                                  |             |                                                                                                                                                                                                                                                                                                                                                                                                                                                                                                                                                                                                                                                                                                                                                                                                                                                                                                                |
| PLA2G4A   | phospholipase A2 group IVA                                       | NM_024420.2 | hsa00564, hsa00565, hsa00590, hsa00591, hsa00592, hsa04014, hsa04010, hsa04370, hsa04072, hsa04217, hsa04611, hsa04664, hsa04666, hsa04912, hsa04913, hsa04921, hsa04270, hsa04724, hsa04726, hsa04730, hsa04750, hsa05231                                                                                                                                                                                                                                                                                                                                                                                                                                                                                                                                                                                                                                                                                     |
| PLCL2     |                                                                  |             |                                                                                                                                                                                                                                                                                                                                                                                                                                                                                                                                                                                                                                                                                                                                                                                                                                                                                                                |
| PLEK      |                                                                  |             |                                                                                                                                                                                                                                                                                                                                                                                                                                                                                                                                                                                                                                                                                                                                                                                                                                                                                                                |
| PLEKHA4   | pleckstrin homology domain containing A4                         | NM_020904.2 |                                                                                                                                                                                                                                                                                                                                                                                                                                                                                                                                                                                                                                                                                                                                                                                                                                                                                                                |
| PLG       |                                                                  |             |                                                                                                                                                                                                                                                                                                                                                                                                                                                                                                                                                                                                                                                                                                                                                                                                                                                                                                                |
| PLK1      |                                                                  |             |                                                                                                                                                                                                                                                                                                                                                                                                                                                                                                                                                                                                                                                                                                                                                                                                                                                                                                                |
| PLSCR1    | phospholipid scramblase 1                                        | NM_021105.2 |                                                                                                                                                                                                                                                                                                                                                                                                                                                                                                                                                                                                                                                                                                                                                                                                                                                                                                                |
| PLSCR2    |                                                                  |             |                                                                                                                                                                                                                                                                                                                                                                                                                                                                                                                                                                                                                                                                                                                                                                                                                                                                                                                |
| PMAIP1    | phorbol-12-myristate-13-acetate-induced protein 1                | NM_021127.2 | hsa04210, hsa04215, hsa04115, hsa05200, hsa05203, hsa05210, hsa01524                                                                                                                                                                                                                                                                                                                                                                                                                                                                                                                                                                                                                                                                                                                                                                                                                                           |
| PMS2CL    |                                                                  |             |                                                                                                                                                                                                                                                                                                                                                                                                                                                                                                                                                                                                                                                                                                                                                                                                                                                                                                                |
| PNMAL1    |                                                                  |             |                                                                                                                                                                                                                                                                                                                                                                                                                                                                                                                                                                                                                                                                                                                                                                                                                                                                                                                |
| PNPLA6    |                                                                  |             |                                                                                                                                                                                                                                                                                                                                                                                                                                                                                                                                                                                                                                                                                                                                                                                                                                                                                                                |
| PNPT1     |                                                                  |             |                                                                                                                                                                                                                                                                                                                                                                                                                                                                                                                                                                                                                                                                                                                                                                                                                                                                                                                |
| POM121L8P |                                                                  |             |                                                                                                                                                                                                                                                                                                                                                                                                                                                                                                                                                                                                                                                                                                                                                                                                                                                                                                                |
| POMC      |                                                                  |             |                                                                                                                                                                                                                                                                                                                                                                                                                                                                                                                                                                                                                                                                                                                                                                                                                                                                                                                |
| PPARG     |                                                                  |             |                                                                                                                                                                                                                                                                                                                                                                                                                                                                                                                                                                                                                                                                                                                                                                                                                                                                                                                |
| PPBP      |                                                                  |             |                                                                                                                                                                                                                                                                                                                                                                                                                                                                                                                                                                                                                                                                                                                                                                                                                                                                                                                |
| PPM1K     | protein phosphatase Mg2+/Mn2+ dependent 1K                       | NM_152542.4 |                                                                                                                                                                                                                                                                                                                                                                                                                                                                                                                                                                                                                                                                                                                                                                                                                                                                                                                |
| PPP1R15A  | protein phosphatase 1 regulatory subunit 15A                     | NM_014330.3 | hsa04141                                                                                                                                                                                                                                                                                                                                                                                                                                                                                                                                                                                                                                                                                                                                                                                                                                                                                                       |
| PPP2CA    |                                                                  |             |                                                                                                                                                                                                                                                                                                                                                                                                                                                                                                                                                                                                                                                                                                                                                                                                                                                                                                                |
| PPP2R1A   |                                                                  |             |                                                                                                                                                                                                                                                                                                                                                                                                                                                                                                                                                                                                                                                                                                                                                                                                                                                                                                                |
| PRAMEF12  |                                                                  |             |                                                                                                                                                                                                                                                                                                                                                                                                                                                                                                                                                                                                                                                                                                                                                                                                                                                                                                                |
| PRDM10    | PR/SET domain 10                                                 | NM_020228.2 | hsa04014, hsa04010, hsa04310, hsa04340, hsa04371, hsa04020, hsa04024, hsa04140, hsa04114, hsa04530, hsa04540, hsa04611, hsa04062, hsa04911, hsa04910, hsa04922, hsa04923, hsa04912, hsa04913, hsa04915, hsa04914, hsa04921, hsa04926, hsa04918, hsa04919, hsa04928, hsa04916, hsa04924, hsa04925, hsa04927, hsa04261, hsa04270, hsa04970, hsa04971, hsa04976, hsa04962, hsa04961, hsa04724, hsa04727, hsa04725, hsa04728, hsa04726, hsa04720, hsa04723, hsa04740, hsa04742, hsa04750, hsa04211, hsa04213, hsa04713, hsa04714, hsa05200, hsa05205, hsa05203, hsa05012, hsa05020, hsa05030, hsa05031, hsa05032, hsa05034, hsa05414, hsa04934, hsa05110, hsa05166, hsa05163, hsa05169, hsa05165, hsa05165, hsa05146, hsa01522                                                                                                                                                                                     |
| PRKACA    | protein kinase cAMP-activated catalytic subunit alpha            | NM_002730.3 | hsa04014, hsa04010, hsa04310, hsa04340, hsa04371, hsa04020, hsa04024, hsa04140, hsa04114, hsa04530, hsa04540, hsa04611, hsa04062, hsa04911, hsa04910, hsa04922, hsa04923, hsa04912, hsa04913, hsa04915, hsa04914, hsa04921, hsa04926, hsa04918, hsa04919, hsa04928, hsa04916, hsa04924, hsa04925, hsa04927, hsa04261, hsa04270, hsa04970, hsa04971, hsa04976, hsa04962, hsa04961, hsa04724, hsa04727, hsa04725, hsa04728, hsa04726, hsa04720, hsa04723, hsa04740, hsa04742, hsa04750, hsa04211, hsa04213, hsa04713, hsa04714, hsa05200, hsa05205, hsa05203, hsa05012, hsa05020, hsa05030, hsa05031, hsa05032, hsa05034, hsa05414, hsa04934, hsa05110, hsa05166, hsa05163, hsa05169, hsa05165, hsa05165, hsa05146, hsa01522                                                                                                                                                                                     |
| PRKACB    | protein kinase cAMP-activated catalytic subunit beta             | NM_182948.3 | hsa04014, hsa04010, hsa04310, hsa04340, hsa04371, hsa04020, hsa04024, hsa04140, hsa04114, hsa04530, hsa04540, hsa04611, hsa04062, hsa04911, hsa04910, hsa04922, hsa04923, hsa04912, hsa04913, hsa04915, hsa04914, hsa04921, hsa04926, hsa04918, hsa04919, hsa04928, hsa04916, hsa04924, hsa04925, hsa04927, hsa04261, hsa04270, hsa04970, hsa04971, hsa04976, hsa04962, hsa04961, hsa04724, hsa04727, hsa04725, hsa04728, hsa04726, hsa04720, hsa04723, hsa04740, hsa04742, hsa04750, hsa04211, hsa04213, hsa04713, hsa04714, hsa05200, hsa05205, hsa05203, hsa05012, hsa05020, hsa05030, hsa05031, hsa05032, hsa05034, hsa05414, hsa04934, hsa05110, hsa05166, hsa05163, hsa05169, hsa05165, hsa05165, hsa05146, hsa01522                                                                                                                                                                                     |
| PRKACG    | protein kinase cAMP-activated catalytic subunit gamma            | NM_002732.3 | hsa04014, hsa04010, hsa04310, hsa04340, hsa04371, hsa04020, hsa04024, hsa04140, hsa04114, hsa04530, hsa04540, hsa04611, hsa04062, hsa04911, hsa04910, hsa04922, hsa04923, hsa04912, hsa04913, hsa04915, hsa04914, hsa04921, hsa04926, hsa04918, hsa04919, hsa04928, hsa04916, hsa04924, hsa04925, hsa04927, hsa04261, hsa04270, hsa04970, hsa04971, hsa04976, hsa04962, hsa04961, hsa04724, hsa04727, hsa04725, hsa04728, hsa04726, hsa04720, hsa04723, hsa04740, hsa04742, hsa04750, hsa04211, hsa04213, hsa04713, hsa04714, hsa05200, hsa05205, hsa05203, hsa05012, hsa05020, hsa05030, hsa05031, hsa05032, hsa05034, hsa05414, hsa04934, hsa05110, hsa05166, hsa05163, hsa05169, hsa05165, hsa05165, hsa05146, hsa01522                                                                                                                                                                                     |
| PRKAR2A   |                                                                  |             |                                                                                                                                                                                                                                                                                                                                                                                                                                                                                                                                                                                                                                                                                                                                                                                                                                                                                                                |
| PRKCA     |                                                                  |             |                                                                                                                                                                                                                                                                                                                                                                                                                                                                                                                                                                                                                                                                                                                                                                                                                                                                                                                |

|          |                                                             |                |                                                                                                                                                                                                                                                                                                                                                                                  |
|----------|-------------------------------------------------------------|----------------|----------------------------------------------------------------------------------------------------------------------------------------------------------------------------------------------------------------------------------------------------------------------------------------------------------------------------------------------------------------------------------|
| PRL      |                                                             |                |                                                                                                                                                                                                                                                                                                                                                                                  |
| PSMB8    | proteasome subunit beta 8                                   | NM_004159.4    | hsa03050                                                                                                                                                                                                                                                                                                                                                                         |
| PSMB9    | proteasome subunit beta 9                                   | NM_002800.4    | hsa03050                                                                                                                                                                                                                                                                                                                                                                         |
| PTEN     |                                                             |                |                                                                                                                                                                                                                                                                                                                                                                                  |
| PTGER4   | prostaglandin E receptor 4                                  | NM_000958.2    | hsa04080, hsa04924, hsa04750, hsa05200, hsa05163, hsa05165                                                                                                                                                                                                                                                                                                                       |
| PTGS2    | prostaglandin-endoperoxide synthase 2                       | NM_000963.3    | hsa00590, hsa04370, hsa04064, hsa04668, hsa04625, hsa04657, hsa04923, hsa04913, hsa04921, hsa04726, hsa04723, hsa05200, hsa05206, hsa05204, hsa05222, hsa05163, hsa05167, hsa05165, hsa05140                                                                                                                                                                                     |
| PTH      |                                                             |                |                                                                                                                                                                                                                                                                                                                                                                                  |
| PTPN11   |                                                             |                |                                                                                                                                                                                                                                                                                                                                                                                  |
| PTPRR    |                                                             |                |                                                                                                                                                                                                                                                                                                                                                                                  |
| PVALB    |                                                             |                |                                                                                                                                                                                                                                                                                                                                                                                  |
| RAC1     |                                                             |                |                                                                                                                                                                                                                                                                                                                                                                                  |
| RAC2     |                                                             |                |                                                                                                                                                                                                                                                                                                                                                                                  |
| RANBP2   |                                                             |                |                                                                                                                                                                                                                                                                                                                                                                                  |
| RANBP3L  |                                                             |                |                                                                                                                                                                                                                                                                                                                                                                                  |
| RASGRP3  | RAS guanyl releasing protein 3                              | NM_001139488.1 | hsa04014, hsa04015, hsa04010, hsa04662, hsa05200                                                                                                                                                                                                                                                                                                                                 |
| RB1      |                                                             |                |                                                                                                                                                                                                                                                                                                                                                                                  |
| REM1     |                                                             |                |                                                                                                                                                                                                                                                                                                                                                                                  |
| REV3L    |                                                             |                |                                                                                                                                                                                                                                                                                                                                                                                  |
| RGAG1    | retrotransposon gag domain containing 1                     | NM_020769.2    |                                                                                                                                                                                                                                                                                                                                                                                  |
| RHO      |                                                             |                | hsa04014, hsa04015, hsa04310, hsa04350, hsa04072, hsa04071, hsa04024, hsa04022, hsa04150, hsa04144, hsa04510, hsa04520, hsa04530, hsa04810, hsa04611, hsa04621, hsa04625, hsa04660, hsa04670, hsa04062, hsa04921, hsa04928, hsa04270, hsa04972, hsa04722, hsa04360, hsa05200, hsa05206, hsa05205, hsa05203, hsa05210, hsa05418, hsa05130, hsa05133, hsa05152, hsa05100, hsa05163 |
| RHOA     | ras homolog family member A                                 | NM_001664.3    |                                                                                                                                                                                                                                                                                                                                                                                  |
| RIPK4    | receptor interacting serine/threonine kinase 4              | NM_020639.2    |                                                                                                                                                                                                                                                                                                                                                                                  |
| RIT2     |                                                             |                |                                                                                                                                                                                                                                                                                                                                                                                  |
| RPL27A   |                                                             |                |                                                                                                                                                                                                                                                                                                                                                                                  |
| RPS27A   | ribosomal protein S27a                                      | NM_002954.5    | hsa03010                                                                                                                                                                                                                                                                                                                                                                         |
| RSAD2    | radical S-adenosyl methionine domain containing 2           | NM_080657.4    |                                                                                                                                                                                                                                                                                                                                                                                  |
| RTP4     | receptor transporter protein 4                              | NM_022147.2    |                                                                                                                                                                                                                                                                                                                                                                                  |
| SAMD9    | sterile alpha motif domain containing 9                     | NM_017654.3    |                                                                                                                                                                                                                                                                                                                                                                                  |
| SAMD9L   | sterile alpha motif domain containing 9 like                | NM_152703.4    |                                                                                                                                                                                                                                                                                                                                                                                  |
| SAMHD1   | SAM and HD domain containing deoxynucleoside triphosphatase | NM_015474.3    |                                                                                                                                                                                                                                                                                                                                                                                  |
| SCAND3   |                                                             |                |                                                                                                                                                                                                                                                                                                                                                                                  |
| SCIN     | scinderin                                                   | NM_001112706.2 | hsa04810, hsa04666, hsa05203                                                                                                                                                                                                                                                                                                                                                     |
| SCN3A    | sodium voltage-gated channel alpha subunit 3                | NM_006922.3    | hsa04742                                                                                                                                                                                                                                                                                                                                                                         |
| SELV     |                                                             |                |                                                                                                                                                                                                                                                                                                                                                                                  |
| SEMA3A   | semaphorin 3A                                               | NM_006080.2    | hsa04360                                                                                                                                                                                                                                                                                                                                                                         |
| SEMA3D   | semaphorin 3D                                               | NM_152754.2    | hsa04360                                                                                                                                                                                                                                                                                                                                                                         |
| SERPINF2 | serpin family B member 2                                    | NM_001143818.1 | hsa04610                                                                                                                                                                                                                                                                                                                                                                         |
| SETD2    |                                                             |                |                                                                                                                                                                                                                                                                                                                                                                                  |
| SH3GL1   |                                                             |                |                                                                                                                                                                                                                                                                                                                                                                                  |
| SHH      |                                                             |                |                                                                                                                                                                                                                                                                                                                                                                                  |
| SIN3A    | SIN3 transcription regulator family member A                | NM_001145358.1 | hsa04919, hsa05202, hsa05016                                                                                                                                                                                                                                                                                                                                                     |
| SLC25A1  |                                                             |                |                                                                                                                                                                                                                                                                                                                                                                                  |
| SLC27A2  |                                                             |                |                                                                                                                                                                                                                                                                                                                                                                                  |
| SMAD2    |                                                             |                |                                                                                                                                                                                                                                                                                                                                                                                  |
| SMAD3    |                                                             |                |                                                                                                                                                                                                                                                                                                                                                                                  |
| SMARCA2  |                                                             |                |                                                                                                                                                                                                                                                                                                                                                                                  |
| SNORA2A  |                                                             |                |                                                                                                                                                                                                                                                                                                                                                                                  |
| SNORD67  |                                                             |                |                                                                                                                                                                                                                                                                                                                                                                                  |
| SNRPN    |                                                             |                |                                                                                                                                                                                                                                                                                                                                                                                  |
| SP1      | Sp1 transcription factor                                    | NM_138473.2    | hsa04350, hsa04137, hsa04915, hsa04928, hsa04927, hsa05200, hsa05231, hsa05202, hsa05224, hsa05016, hsa04934, hsa05163, hsa05122                                                                                                                                                                                                                                                 |
| SP100    | SP100 nuclear antigen                                       | NM_001080391.1 | hsa05203, hsa05168                                                                                                                                                                                                                                                                                                                                                               |
| SP110    | SP110 nuclear body protein                                  | NM_004509.3    |                                                                                                                                                                                                                                                                                                                                                                                  |
| SP140L   |                                                             |                |                                                                                                                                                                                                                                                                                                                                                                                  |
| SPINT4   |                                                             |                |                                                                                                                                                                                                                                                                                                                                                                                  |
| SPRR1B   |                                                             |                |                                                                                                                                                                                                                                                                                                                                                                                  |
| SPTAN1   | spectrin alpha, non-erythrocytic 1                          | NM_001130438.2 | hsa04210                                                                                                                                                                                                                                                                                                                                                                         |
| SRC      | SRC proto-oncogene, non-receptor tyrosine kinase            | NM_005417.4    | hsa04015, hsa04012, hsa04370, hsa04144, hsa04137, hsa04510, hsa04520, hsa04530, hsa04540, hsa04810, hsa04611, hsa04625, hsa04062, hsa04912, hsa04915, hsa04917, hsa04921, hsa04926, hsa04919, hsa04727, hsa04750, hsa04360, hsa05205, hsa05203, hsa05219, hsa05418, hsa05120, hsa05131, hsa05152, hsa05100, hsa05161, hsa05163, hsa05167, hsa051521, hsa051522                   |
| SSRP1    |                                                             |                |                                                                                                                                                                                                                                                                                                                                                                                  |
| SST      |                                                             |                |                                                                                                                                                                                                                                                                                                                                                                                  |
| SSTR2    |                                                             |                |                                                                                                                                                                                                                                                                                                                                                                                  |
| STAMBPL1 |                                                             |                | hsa04630, hsa04217, hsa04620, hsa04621, hsa04625, hsa04658, hsa04659, hsa04062, hsa04917, hsa04919, hsa04380, hsa05200, hsa05212, hsa05321, hsa04933, hsa05152, hsa05162, hsa05164, hsa05161, hsa05160, hsa05168, hsa05167, hsa05165, hsa05145, hsa05140                                                                                                                         |
| STAT1    | signal transducer and activator of transcription 1          | NM_007315.3    | hsa04630, hsa04217, hsa04621, hsa04625, hsa04062, hsa04380, hsa05200, hsa05162, hsa05164, hsa05161, hsa05160, hsa05168, hsa05167, hsa05165                                                                                                                                                                                                                                       |
| STAT2    | signal transducer and activator of transcription 2          | NM_005419.3    | hsa04630, hsa04066, hsa04068, hsa04217, hsa04550, hsa04659, hsa04062, hsa04920, hsa04917, hsa05200, hsa05206, hsa05205, hsa05203, hsa05212, hsa05221, hsa05223, hsa05321, hsa04931, hsa04933, hsa05162, hsa05161, hsa05160, hsa05163, hsa05167, hsa05169, hsa05145, hsa051521                                                                                                    |
| STAT3    | signal transducer and activator of transcription 3          | NM_139276.2    |                                                                                                                                                                                                                                                                                                                                                                                  |
| SULT4A1  |                                                             |                |                                                                                                                                                                                                                                                                                                                                                                                  |
| SYK      |                                                             |                |                                                                                                                                                                                                                                                                                                                                                                                  |
| TAF1     | TATA-box binding protein associated factor 1                | NM_004606.4    | hsa03022                                                                                                                                                                                                                                                                                                                                                                         |
| TAOK1    |                                                             |                |                                                                                                                                                                                                                                                                                                                                                                                  |
| TAP1     | transporter 1, ATP binding cassette subfamily B member 1    | NM_000593.5    | hsa02010, hsa04145, hsa04612, hsa05340, hsa05168, hsa05163                                                                                                                                                                                                                                                                                                                       |

|                 |                                                         |                |                                                                                                                                                                                                                                                                                                                                                                                                                                                                                                                                                                       |
|-----------------|---------------------------------------------------------|----------------|-----------------------------------------------------------------------------------------------------------------------------------------------------------------------------------------------------------------------------------------------------------------------------------------------------------------------------------------------------------------------------------------------------------------------------------------------------------------------------------------------------------------------------------------------------------------------|
| TAS2R13         |                                                         |                |                                                                                                                                                                                                                                                                                                                                                                                                                                                                                                                                                                       |
| TAS2R8          |                                                         |                |                                                                                                                                                                                                                                                                                                                                                                                                                                                                                                                                                                       |
| TCEAL7          |                                                         |                |                                                                                                                                                                                                                                                                                                                                                                                                                                                                                                                                                                       |
| TDRD7           | tudor domain containing 7                               | NM_014290.2    |                                                                                                                                                                                                                                                                                                                                                                                                                                                                                                                                                                       |
| TEX9            |                                                         |                | hsa04010, hsa04350, hsa04390, hsa04068, hsa04060, hsa04110, hsa04218, hsa04659, hsa04672, hsa04926, hsa04380, hsa05200, hsa05205, hsa05210, hsa05212, hsa05225, hsa05226, hsa05220, hsa05211, hsa05323, hsa05321, hsa05410, hsa05414, hsa04932, hsa04933, hsa05152, hsa05166, hsa05161, hsa05146, hsa05144, hsa05145, hsa05140, hsa05142                                                                                                                                                                                                                              |
| TGFB1           | transforming growth factor beta 1                       | NM_000660.6    |                                                                                                                                                                                                                                                                                                                                                                                                                                                                                                                                                                       |
| TKTL2           |                                                         |                |                                                                                                                                                                                                                                                                                                                                                                                                                                                                                                                                                                       |
| TLR3            | toll like receptor 3                                    | NM_003265.2    | hsa04217, hsa04620, hsa05164, hsa05161, hsa05160, hsa05168, hsa05167, hsa05165                                                                                                                                                                                                                                                                                                                                                                                                                                                                                        |
| TLR4            |                                                         |                |                                                                                                                                                                                                                                                                                                                                                                                                                                                                                                                                                                       |
| TMEM140         | transmembrane protein 140                               | NM_018295.4    |                                                                                                                                                                                                                                                                                                                                                                                                                                                                                                                                                                       |
|                 |                                                         |                | hsa04010, hsa04350, hsa04064, hsa04668, hsa04071, hsa04150, hsa04060, hsa04210, hsa04217, hsa04640, hsa04620, hsa04621, hsa04622, hsa04625, hsa04650, hsa04612, hsa04660, hsa04657, hsa04664, hsa04920, hsa04380, hsa05205, hsa05310, hsa05322, hsa05323, hsa05321, hsa05330, hsa05332, hsa05010, hsa05014, hsa05418, hsa05410, hsa05414, hsa04930, hsa04940, hsa04932, hsa04931, hsa04933, hsa05133, hsa05134, hsa05152, hsa05166, hsa05164, hsa05161, hsa05160, hsa05168, hsa05163, hsa05165, hsa05146, hsa05144, hsa05145, hsa05140, hsa05142, hsa05143, hsa051523 |
| TNF             | tumor necrosis factor                                   | NM_000594.3    |                                                                                                                                                                                                                                                                                                                                                                                                                                                                                                                                                                       |
| TNFAIP3         | TNF alpha induced protein 3                             | NM_001270508.1 | hsa04064, hsa04668, hsa04217, hsa04621, hsa04657, hsa05162, hsa05169                                                                                                                                                                                                                                                                                                                                                                                                                                                                                                  |
| TNFRSF10A       |                                                         |                |                                                                                                                                                                                                                                                                                                                                                                                                                                                                                                                                                                       |
| TNFRSF17        |                                                         |                |                                                                                                                                                                                                                                                                                                                                                                                                                                                                                                                                                                       |
| TNFSF10         | TNF superfamily member 10                               | NM_003810.3    | hsa04068, hsa04060, hsa04210, hsa04217, hsa04650, hsa05162, hsa05164                                                                                                                                                                                                                                                                                                                                                                                                                                                                                                  |
| TNFSF13B        | TNF superfamily member 13b                              | NM_006573.4    | hsa04064, hsa04060, hsa04672, hsa05323                                                                                                                                                                                                                                                                                                                                                                                                                                                                                                                                |
| TOP2A           | DNA topoisomerase II alpha                              | NM_001067.3    | hsa01524                                                                                                                                                                                                                                                                                                                                                                                                                                                                                                                                                              |
| TOP2B           | DNA topoisomerase II beta                               | NM_001330700.1 | hsa01524                                                                                                                                                                                                                                                                                                                                                                                                                                                                                                                                                              |
|                 |                                                         |                | hsa04010, hsa04310, hsa04071, hsa04151, hsa04137, hsa04110, hsa04210, hsa04216, hsa04115, hsa04218, hsa04919, hsa04722, hsa04211, hsa05200, hsa05230, hsa05202, hsa05206, hsa05205, hsa05203, hsa05210, hsa05212, hsa05225, hsa05226, hsa05214, hsa05216, hsa05220, hsa05217, hsa05218, hsa05219, hsa05215, hsa05213, hsa05224, hsa05223, hsa05014, hsa05016, hsa05418, hsa05166, hsa05162, hsa05161, hsa05160, hsa05168, hsa05163, hsa05167, hsa05169, hsa05165, hsa01524, hsa01522                                                                                  |
| TP53            | tumor protein p53                                       | NM_001276760.1 |                                                                                                                                                                                                                                                                                                                                                                                                                                                                                                                                                                       |
| TPPP2           |                                                         |                |                                                                                                                                                                                                                                                                                                                                                                                                                                                                                                                                                                       |
| TRAF1           | TNF receptor associated factor 1                        | NM_005658.4    | hsa04064, hsa04668, hsa04210, hsa05200, hsa05202, hsa05203, hsa05222, hsa05168, hsa05169                                                                                                                                                                                                                                                                                                                                                                                                                                                                              |
| TRAF6           |                                                         |                |                                                                                                                                                                                                                                                                                                                                                                                                                                                                                                                                                                       |
| TRIM14          |                                                         |                |                                                                                                                                                                                                                                                                                                                                                                                                                                                                                                                                                                       |
| TRIM21          | tripartite motif containing 21                          | NM_003141.3    | hsa05322                                                                                                                                                                                                                                                                                                                                                                                                                                                                                                                                                              |
| TRIM22          | tripartite motif containing 22                          | NM_006074.4    |                                                                                                                                                                                                                                                                                                                                                                                                                                                                                                                                                                       |
| TRIM25          |                                                         |                |                                                                                                                                                                                                                                                                                                                                                                                                                                                                                                                                                                       |
| TRIM28          | tripartite motif containing 28                          | NM_005762.2    |                                                                                                                                                                                                                                                                                                                                                                                                                                                                                                                                                                       |
| 34 /// TRIM6-TI | tripartite motif containing 34                          | NM_021616.5    |                                                                                                                                                                                                                                                                                                                                                                                                                                                                                                                                                                       |
| TRIM5           | tripartite motif containing 5                           | NM_033092.2    |                                                                                                                                                                                                                                                                                                                                                                                                                                                                                                                                                                       |
| TSPAN19         |                                                         |                |                                                                                                                                                                                                                                                                                                                                                                                                                                                                                                                                                                       |
| TUBB8           |                                                         |                |                                                                                                                                                                                                                                                                                                                                                                                                                                                                                                                                                                       |
| UBA52           | ubiquitin A-52 residue ribosomal protein fusion product | NM_001033930.2 | hsa03010                                                                                                                                                                                                                                                                                                                                                                                                                                                                                                                                                              |
| UBA7            | ubiquitin like modifier activating enzyme 7             | NM_003335.2    | hsa04120, hsa05012                                                                                                                                                                                                                                                                                                                                                                                                                                                                                                                                                    |
| UBB             | ubiquitin B                                             | NM_018955.3    | hsa04144, hsa04137, hsa05012, hsa05167                                                                                                                                                                                                                                                                                                                                                                                                                                                                                                                                |
| UBC             | ubiquitin C                                             | NM_021009.6    | hsa03320                                                                                                                                                                                                                                                                                                                                                                                                                                                                                                                                                              |
| UBE2L6          | ubiquitin conjugating enzyme E2 L6                      | NM_004223.4    | hsa04120, hsa05012                                                                                                                                                                                                                                                                                                                                                                                                                                                                                                                                                    |
| UBL4B           |                                                         |                |                                                                                                                                                                                                                                                                                                                                                                                                                                                                                                                                                                       |
| UCKL1           |                                                         |                |                                                                                                                                                                                                                                                                                                                                                                                                                                                                                                                                                                       |
| UHMK1           |                                                         |                |                                                                                                                                                                                                                                                                                                                                                                                                                                                                                                                                                                       |
| UMPS            | uridine monophosphate synthetase                        | NM_000373.3    | hsa00240, hsa00983                                                                                                                                                                                                                                                                                                                                                                                                                                                                                                                                                    |
| USP18           | ubiquitin specific peptidase 18                         | NM_017414.3    |                                                                                                                                                                                                                                                                                                                                                                                                                                                                                                                                                                       |
| USP50           |                                                         |                |                                                                                                                                                                                                                                                                                                                                                                                                                                                                                                                                                                       |
| VCX3A           |                                                         |                |                                                                                                                                                                                                                                                                                                                                                                                                                                                                                                                                                                       |
|                 |                                                         |                | hsa04014, hsa04015, hsa04010, hsa04370, hsa04066, hsa04151, hsa04510, hsa04926, hsa05200, hsa05206, hsa05205, hsa05212, hsa05211, hsa05219, hsa05323, hsa05418, hsa04933, hsa05163, hsa05167, hsa05165, hsa01521                                                                                                                                                                                                                                                                                                                                                      |
| VEGFA           | vascular endothelial growth factor A                    | NM_001171623.1 |                                                                                                                                                                                                                                                                                                                                                                                                                                                                                                                                                                       |
| VPREB3          |                                                         |                |                                                                                                                                                                                                                                                                                                                                                                                                                                                                                                                                                                       |
| WDFY2           |                                                         |                |                                                                                                                                                                                                                                                                                                                                                                                                                                                                                                                                                                       |
| WDTC1           |                                                         |                |                                                                                                                                                                                                                                                                                                                                                                                                                                                                                                                                                                       |
| WFDC5           |                                                         |                |                                                                                                                                                                                                                                                                                                                                                                                                                                                                                                                                                                       |
| XAF1            | XIAP associated factor 1                                | NM_017523.4    |                                                                                                                                                                                                                                                                                                                                                                                                                                                                                                                                                                       |
| YARS            |                                                         |                |                                                                                                                                                                                                                                                                                                                                                                                                                                                                                                                                                                       |
| ZAP70           |                                                         |                |                                                                                                                                                                                                                                                                                                                                                                                                                                                                                                                                                                       |
| ZBTB20          |                                                         |                |                                                                                                                                                                                                                                                                                                                                                                                                                                                                                                                                                                       |
| ZC3HAV1         | zinc finger CCCH-type containing, antiviral 1           | NM_020119.3    |                                                                                                                                                                                                                                                                                                                                                                                                                                                                                                                                                                       |
| ZDHHC17         |                                                         |                |                                                                                                                                                                                                                                                                                                                                                                                                                                                                                                                                                                       |
| ZFPM2           |                                                         |                |                                                                                                                                                                                                                                                                                                                                                                                                                                                                                                                                                                       |
| ZFR             |                                                         |                |                                                                                                                                                                                                                                                                                                                                                                                                                                                                                                                                                                       |
| ZNF442          | zinc finger protein 442                                 | NM_030824.2    |                                                                                                                                                                                                                                                                                                                                                                                                                                                                                                                                                                       |
| ZNF557          |                                                         |                |                                                                                                                                                                                                                                                                                                                                                                                                                                                                                                                                                                       |
| ZNF620          |                                                         |                |                                                                                                                                                                                                                                                                                                                                                                                                                                                                                                                                                                       |
| ZNF678          |                                                         |                |                                                                                                                                                                                                                                                                                                                                                                                                                                                                                                                                                                       |
| ZNF79           |                                                         |                |                                                                                                                                                                                                                                                                                                                                                                                                                                                                                                                                                                       |
| ZNF804A         |                                                         |                |                                                                                                                                                                                                                                                                                                                                                                                                                                                                                                                                                                       |
