# Supplementary material for: Drug Repurposing for Japanese Encephalitis Virus Infection by Systems Biology Methods
Source: MDPI journal article supplement (doi:10.3390/molecules23123346), 2018-12-18
Supplement: s1 [file s1]

**Supplementary Table 2: The potential anti-JEV agents discovered by GeneRank algorithm**

| Agents                   | Evidence in JEV treatment | Indications                                                                                                                                                                                                                           |
|--------------------------|---------------------------|---------------------------------------------------------------------------------------------------------------------------------------------------------------------------------------------------------------------------------------|
| ACETYLSALICYLIC ACID     | Y                         | the pain and inflammation, thrombosis                                                                                                                                                                                                 |
| ADALIMUMAB               | N                         | rheumatoid arthritis, ankylosing spondylitis, psoriatic arthritis                                                                                                                                                                     |
| AMSACRINE                | N                         | acute myeloid leukaemia, lymphoma                                                                                                                                                                                                     |
| ANDROGRAPHOLIDE          | N                         | ulcerative colitis                                                                                                                                                                                                                    |
| APREMILAST               | N                         | psoriasis and psoriatic disorders                                                                                                                                                                                                     |
| APRINDINE                | N                         | antiarrhythmic                                                                                                                                                                                                                        |
| ARSENIC TRIOXIDE         | N                         | acute promyelocytic leukemia (APL)                                                                                                                                                                                                    |
| AV411                    | N                         | neuropathic pain                                                                                                                                                                                                                      |
| BAY80-6946 (COPANLISIB)  | N                         | relapsed follicular lymphoma (FL)                                                                                                                                                                                                     |
| BEPRIDIL                 | N                         | hypertension, chronic stable angina, antiarrhythmic                                                                                                                                                                                   |
| BEVACIZUMAB              | N                         | metastatic colorectal cancer, HER2-negative metastatic breast cancer                                                                                                                                                                  |
| BGJ398                   | N                         | bladder cancer, cholangiocarcinoma                                                                                                                                                                                                    |
| BINIMETINIB              | N                         | metastatic melanoma                                                                                                                                                                                                                   |
| BORTEZOMIB               | N                         | multiple myeloma, lymphoma                                                                                                                                                                                                            |
| BUPARLISIB HYDROCHLORIDE | N                         | breast cancer                                                                                                                                                                                                                         |
| BYL719 (ALPELISIB)       | N                         | breast cancer                                                                                                                                                                                                                         |
| CAFFEINE                 | N                         | fatigue, neurasthenia                                                                                                                                                                                                                 |
| CARBAMAZEPINE            | N                         | epilepsy                                                                                                                                                                                                                              |
| CELECOXIB                | N                         | osteoarthritis (OA), rheumatoid arthritis (RA), juvenile rheumatoid arthritis (JRA), ankylosing spondylitis,                                                                                                                          |
| CETUXIMAB                | N                         | metastatic colorectal carcinoma,                                                                                                                                                                                                      |
| CH5132799                | N                         | cancer                                                                                                                                                                                                                                |
| CHLORPROMAZINE           | Y                         | schizophrenia, intermittent porphyria                                                                                                                                                                                                 |
| CINCHOCAINE              | N                         | anesthesia                                                                                                                                                                                                                            |
| CRX-139                  | N                         | rheumatoid arthritis                                                                                                                                                                                                                  |
| CUDC-101                 | N                         | breast cancer                                                                                                                                                                                                                         |
| CURCUMIN                 | Y                         | cancer, rheumatoid arthritis, inflammatory bowel disease                                                                                                                                                                              |
| DACTOLISIB               | N                         | follicular lymphoma (FL), breast cancer, prostatic carcinoma, leukaemia                                                                                                                                                               |
| DASATINIB                | N                         | chronic myeloid leukemia                                                                                                                                                                                                              |
| DEXIBUPROFEN             | N                         | analgesic, anti-inflammatory, antipyretic                                                                                                                                                                                             |
| DICLOFENAC               | N                         | osteoarthritis, rheumatoid arthritis                                                                                                                                                                                                  |
| DILMAPIMOD               | N                         | inflammation, pain, neuropathic, arthritis, rheumatoid, coronary heart disease                                                                                                                                                        |
| DOXORUBICIN              | N                         | acute lymphoblastic leukemia, acute myeloblastic leukemia, Wilms' tumor, neuroblastoma, soft tissue and bone sarcomas, breast carcinoma, ovarian carcinoma, transitional cell bladder carcinoma, thyroid carcinoma, gastric carcinoma |
| DS-7423                  | N                         | cancer                                                                                                                                                                                                                                |
| DUVELISIB                | N                         | chronic lymphocytic leukemia (CLL), small lymphocytic lymphoma (SLL)                                                                                                                                                                  |
| ENMD-2076                | N                         | breast cancer, leukemia (unspecified), lung cancer, solid tumors                                                                                                                                                                      |
| ERLOTINIB                | N                         | non-small cell lung cancer, metastatic pancreatic cancer                                                                                                                                                                              |
| ETANERCEPT               | Y                         | rheumatoid arthritis, psoriatic arthritis, ankylosing spondylitis                                                                                                                                                                     |
| EVEROLIMUS               | N                         | breast cancer, neuroendocrine tumor,                                                                                                                                                                                                  |
| FELODIPINE               | N                         | hypertension                                                                                                                                                                                                                          |
| FLUNARIZINE              | N                         | migraine, occlusive peripheral vascular disease, vertigo of central, peripheral origin                                                                                                                                                |
| FLUPHENAZINE             | N                         | psychotic disorders                                                                                                                                                                                                                   |
| GDC-0941                 | N                         | solid cancers, breast cancer                                                                                                                                                                                                          |
| GDC-0980                 | N                         | renal cell carcinoma, endometrial carcinoma, Non-Hodgkin's lymphoma                                                                                                                                                                   |
| GEFITINIB                | N                         | non-small cell lung cancer                                                                                                                                                                                                            |
| GENISTEIN                | Y                         | prostate cancer                                                                                                                                                                                                                       |
| GLUCOSAMINE              | N                         | osteoarthritis                                                                                                                                                                                                                        |
| GSK2126458               | N                         | cancer                                                                                                                                                                                                                                |
| GSK2636771               | N                         | melanoma                                                                                                                                                                                                                              |
| HMPL-004                 | N                         | inflammatory colitis                                                                                                                                                                                                                  |
| IBUPROFEN                | N                         | analgesic, anti-inflammatory, antipyretic                                                                                                                                                                                             |
| ISOFLURANE               | N                         | general anesthesia                                                                                                                                                                                                                    |
| JAK3 INHIBITOR II        | N                         | rheumatoid arthritis                                                                                                                                                                                                                  |
| LENALIDOMIDE             | N                         | multiple myeloma, transfusion-dependent anemia                                                                                                                                                                                        |
| LOPERAMIDE               | N                         | nonspecific diarrhea, chronic diarrhea                                                                                                                                                                                                |
| LY 294002                | N                         | colon cancer                                                                                                                                                                                                                          |
| MELATONIN                | N                         | sleep disorders                                                                                                                                                                                                                       |
| MINOCYCLINE              | Y                         | infections caused by susceptible strains of microorganisms                                                                                                                                                                            |
| MOMELOTINIB              | N                         | myelofibrosis                                                                                                                                                                                                                         |
| NICARDIPINE              | N                         | angina, hypertension                                                                                                                                                                                                                  |
| NIFEDIPINE               | N                         | vasospastic angina, chronic stable angina, hypertension, and Raynaud's phenomenon                                                                                                                                                     |
| OXALIPLATIN              | N                         | colon carcinoma, rectum carcinoma                                                                                                                                                                                                     |
| PACLITAXEL               | N                         | Kaposi's sarcoma, lung cancer, ovarian cancer, breast cancer                                                                                                                                                                          |
| PANITUMUMAB              | N                         | colorectal carcinoma                                                                                                                                                                                                                  |
| PERPHENAZINE             | N                         | psychotic disorders                                                                                                                                                                                                                   |
| PF-4691502               | N                         | breast cancer                                                                                                                                                                                                                         |
| PHENOXYBENZAMINE         | N                         | phaeochromocytoma (malignant), benign prostatic hypertrophy, malignant essential hypertension                                                                                                                                         |
| PIMOZIDE                 | N                         | tourette's disorder                                                                                                                                                                                                                   |
| PKI-58 (Gedatolisib)     | N                         | breast cancer, lung cancer squamous cell                                                                                                                                                                                              |
| PRENYLAMINE              | N                         | angina pectoris, myocardial infarction, coronary atherosclerosis                                                                                                                                                                      |
| PROMETHAZINE             | N                         | allergic disorders, nausea/vomiting                                                                                                                                                                                                   |
| PSEUDOEPHEDRINE          | N                         | nasal congestion, sinus congestion, eustachian tube congestion, vasomotor rhinitis, allergic rhinitis, croup, sinusitis, otitis media, tracheobronchitis                                                                              |
| PWT33597                 | N                         | malignancies                                                                                                                                                                                                                          |
| PX-866                   | N                         | prostate cancer                                                                                                                                                                                                                       |
| RESVERATROL              | N                         | Herpes labialis infections                                                                                                                                                                                                            |

|                        |   |                                                                                             |
|------------------------|---|---------------------------------------------------------------------------------------------|
| RIBAVIRIN              | Y | Hepatitis C virus (HCV) infection                                                           |
| RIGOSERTIB             | N | chronic myelomonocytic leukemia                                                             |
| SF1126                 | N | cancer                                                                                      |
| SOPHORETIN (QUERCETIN) | N | cough, hypertension                                                                         |
| SORAFENIB              | N | hepatocellular carcinoma, renal cell carcinoma                                              |
| TALMAPIMOD             | N | rheumatoid arthritis                                                                        |
| TEMSIROLIMUS           | N | renal cell carcinoma (RCC), breast cancer, lymphoma, rheumatoid arthritis, multiple myeloma |
| TG-100-115             | N | angioedema, myocardial infarction                                                           |
| THALIDOMIDE            | N | erythema nodosum leprosum (ENL)                                                             |
| TRASTUZUMAB            | N | breast cancer                                                                               |
| TRIFLUOPERAZINE        | N | anxiety disorders, depressive symptoms                                                      |
| VALPROIC ACID          | Y | seizure disorders, mania, migraine headache                                                 |
| VANDETANIB             | N | thyroid cancer                                                                              |
| VX-702                 | N | coronary artery disease, inflammatory disorders, rheumatoid arthritis                       |
| XL147                  | N | endometrial cancer, endometrial neoplasms                                                   |
| XL765                  | N | cancer                                                                                      |
| ZSTK474                | N | cancer                                                                                      |

---
